# Supplementary material
Source: PubMed Central journal article supplement (PMC4159649)

# Supplementary Figure S1: Annotated spectra for proteins identified by a single peptide

Scan number 2336 Raw file SP\_120724\_90  
 Method ITMS; CID Genenames ABCC12

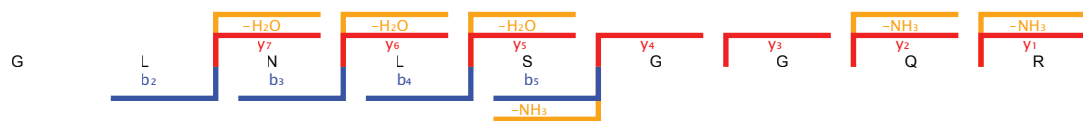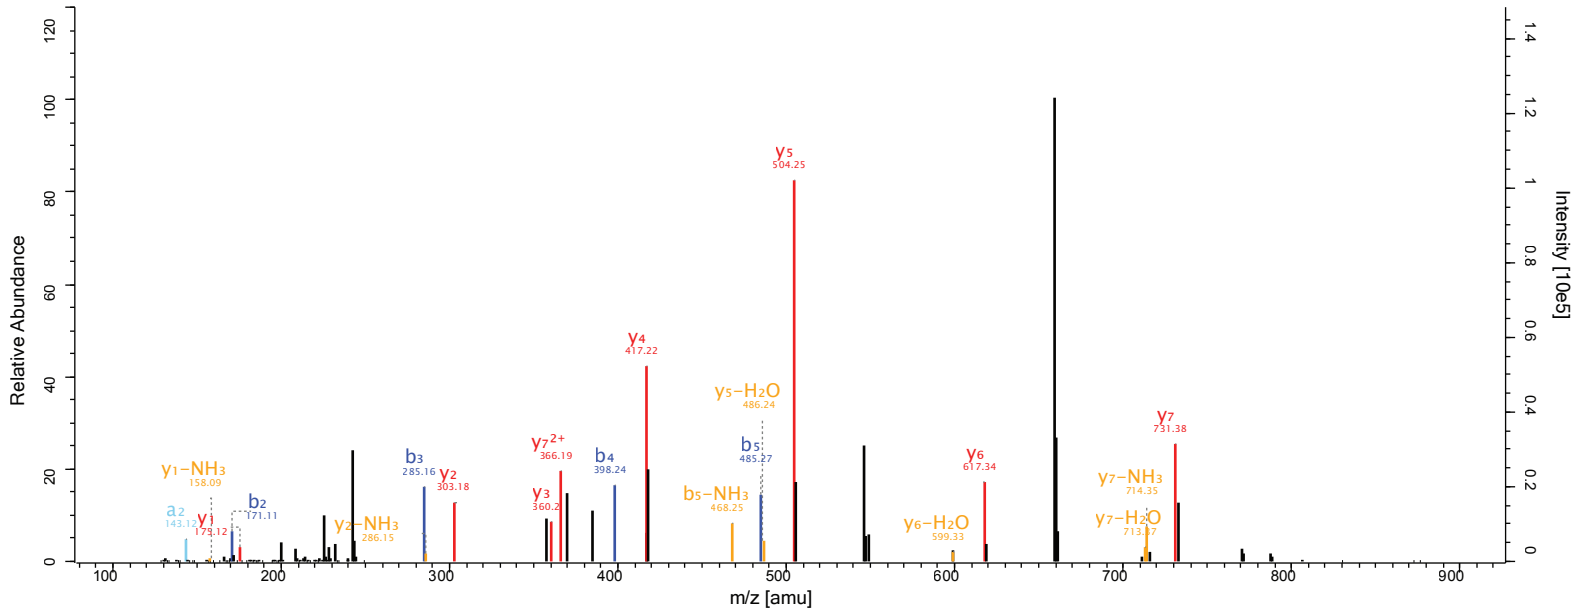

Scan number 4043 Raw file SP\_120724\_72  
 Method ITMS; CID Genenames ACTA2;ACTG2

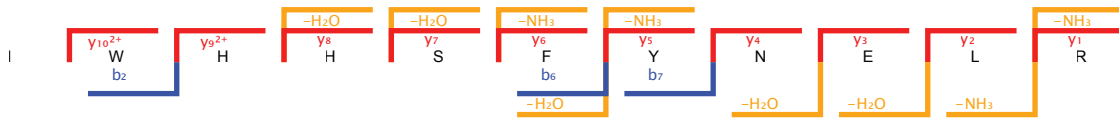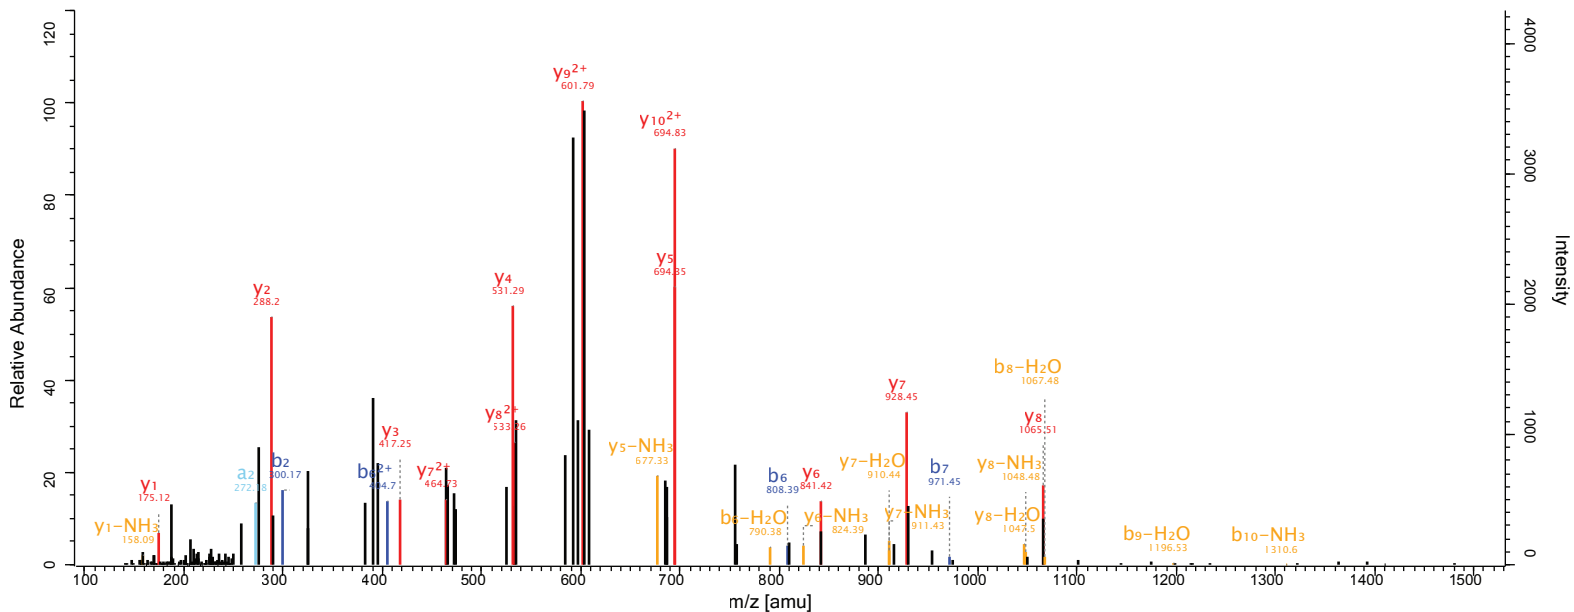

Scan number 1306 Raw file SP\_120724\_216  
 Method ITMS; CID Genenames ALG3

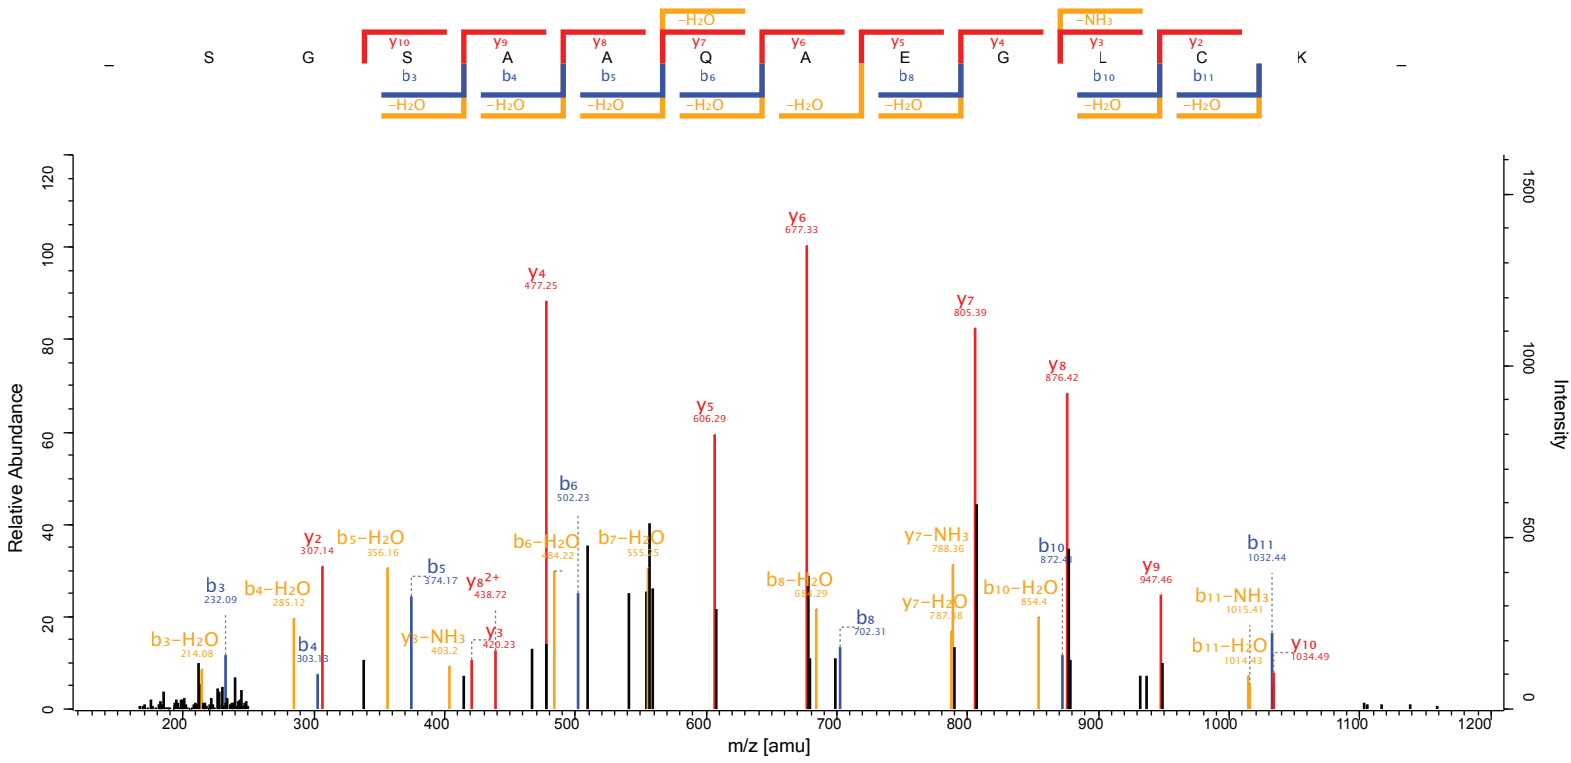

Scan number 2587 Raw file SP\_120724\_220  
 Method ITMS; CID Genenames C11orf10

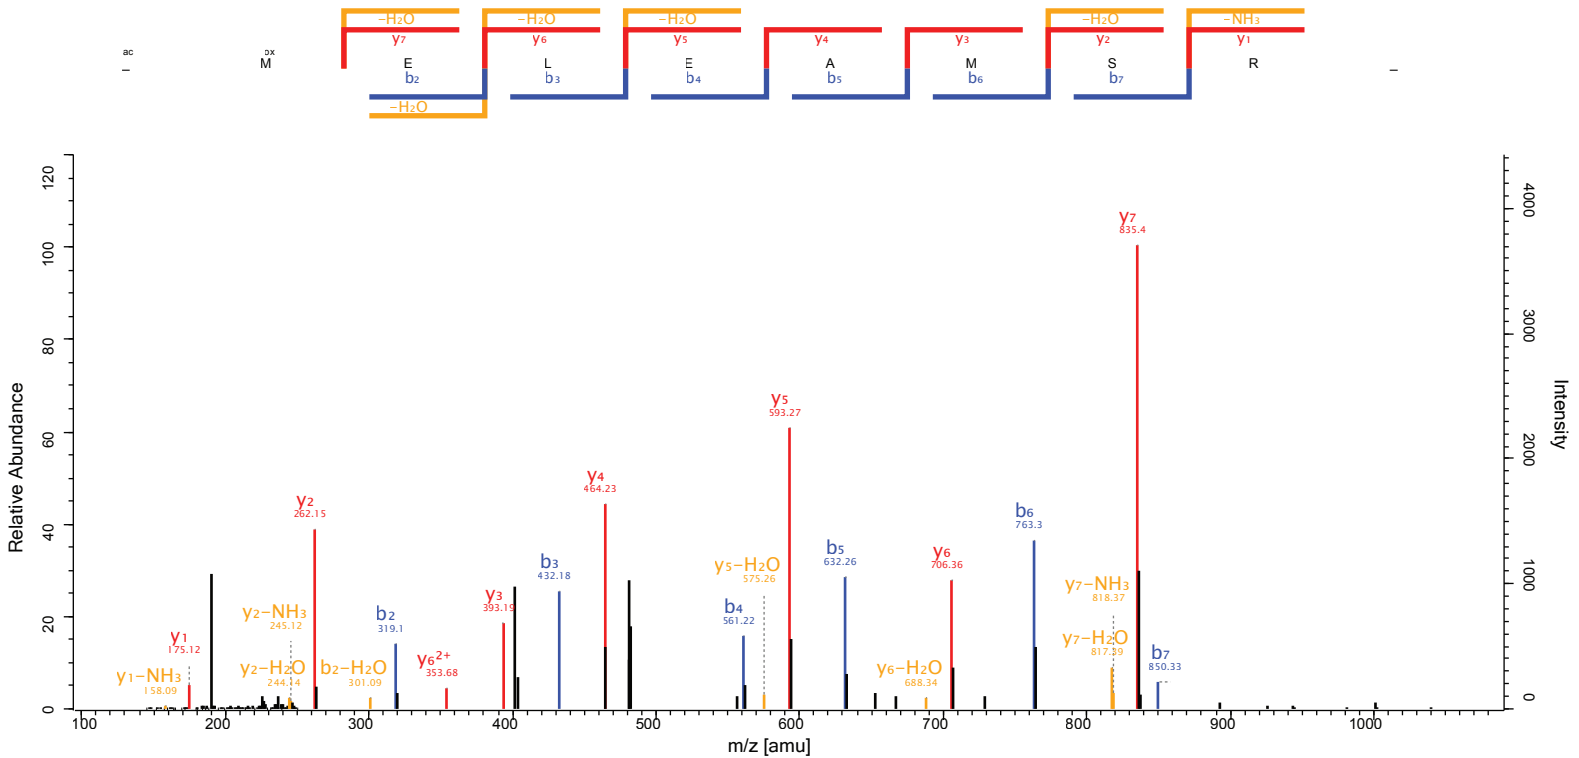

Scan number 4126 Raw file SP\_120724\_90  
 Method ITMS; CID Genenames C20orf24

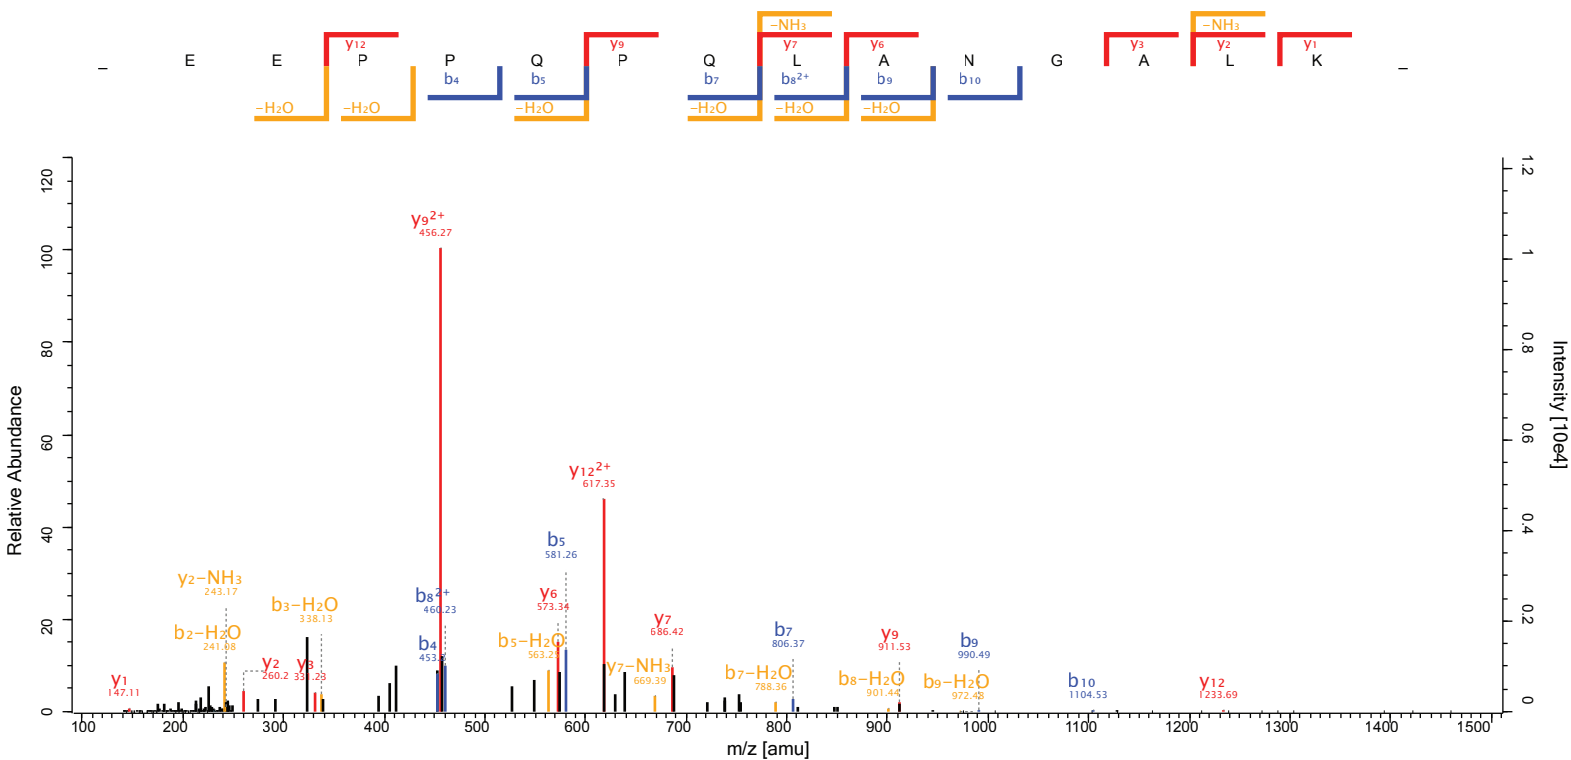

Scan number 4982 Raw file SP\_120724\_195  
 Method ITMS; CID Genenames CD36

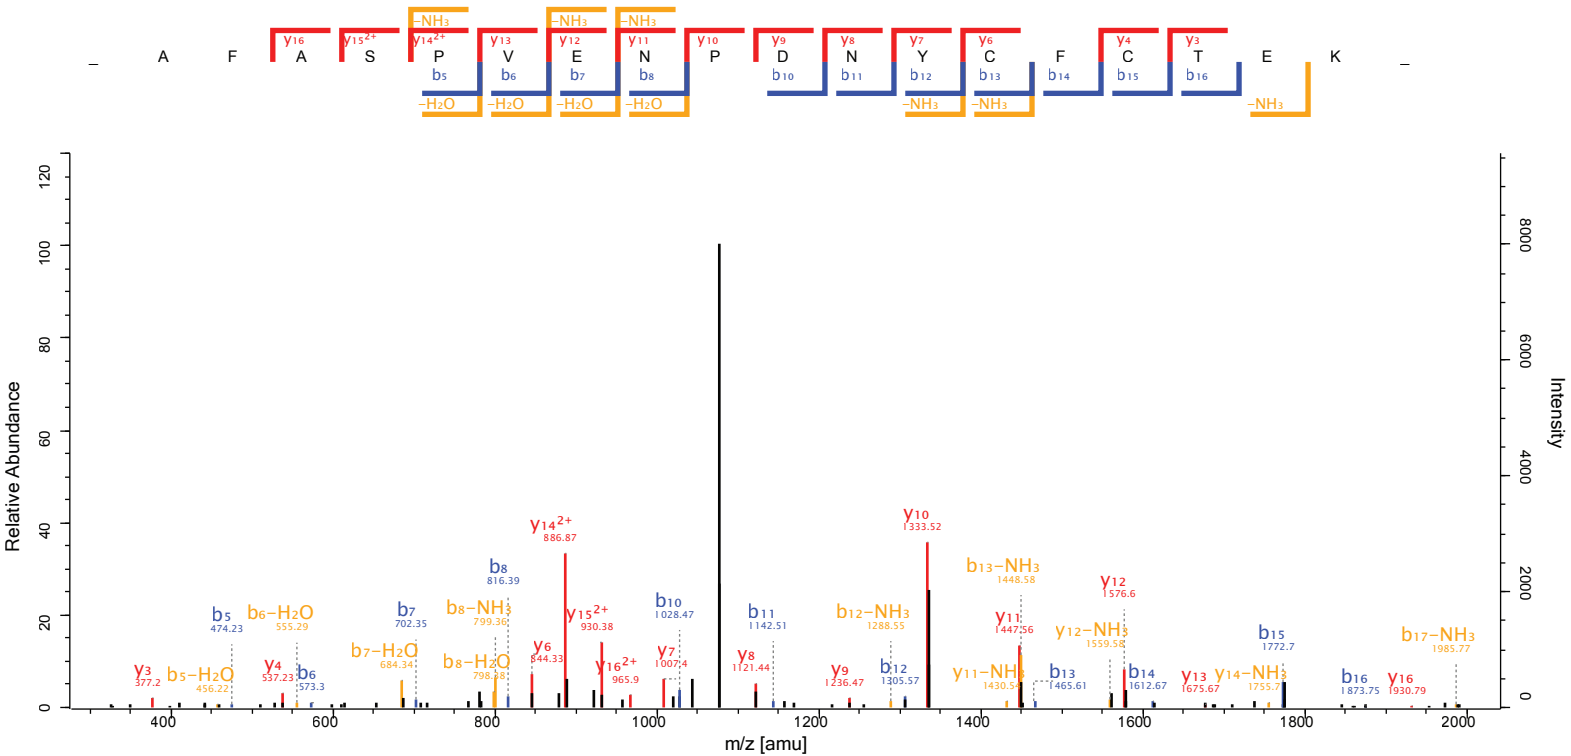

Scan number 4497 Raw file SP\_120724\_152  
 Method ITMS; CID Genenames CDIPT

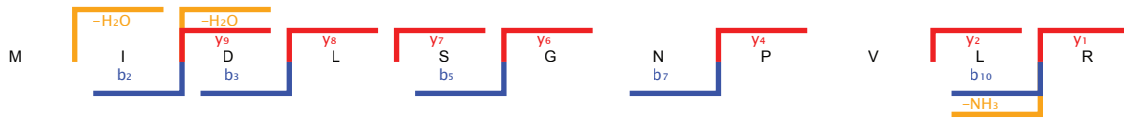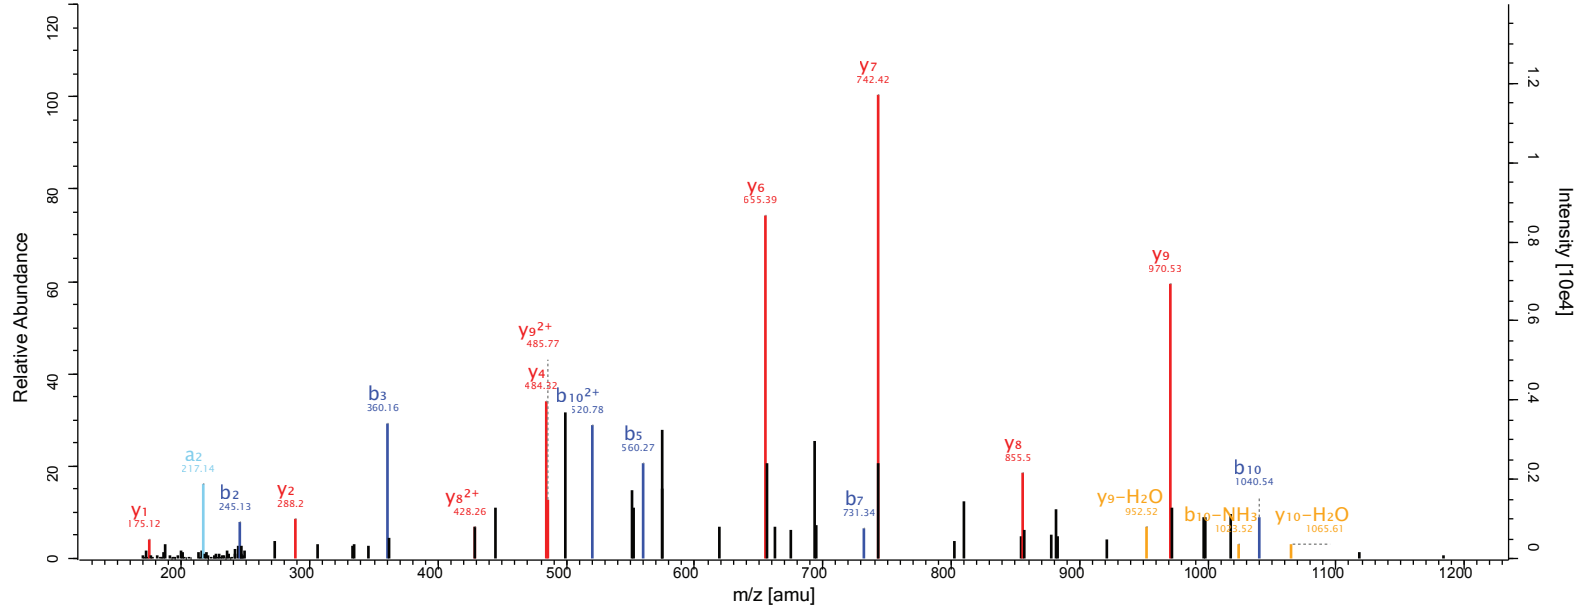

Scan number 6647 Raw file SP\_120724\_172  
 Method ITMS; CID Genenames CEPT1

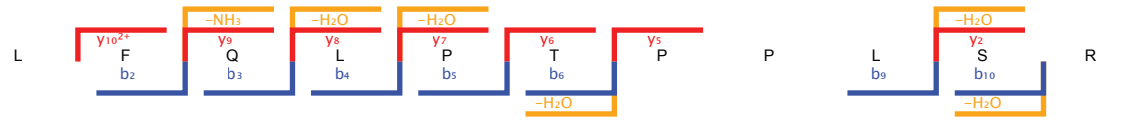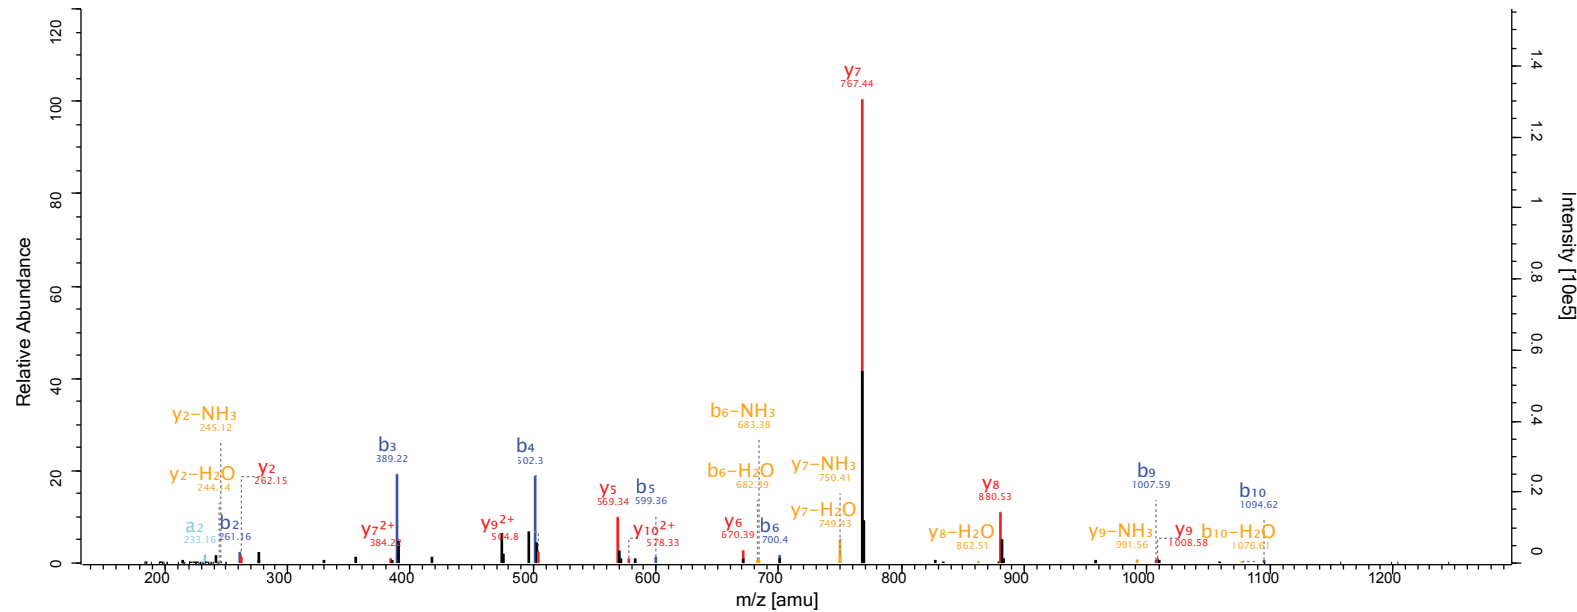

Scan number 6493 Raw file SP\_120724\_122  
 Method ITMS; CID Genenames CLN8

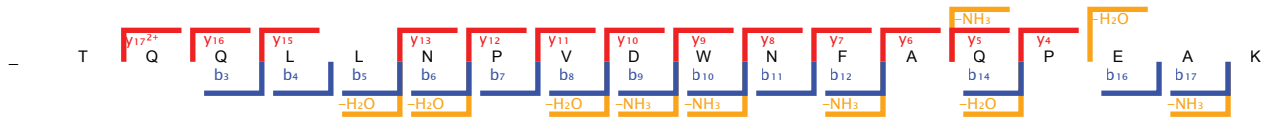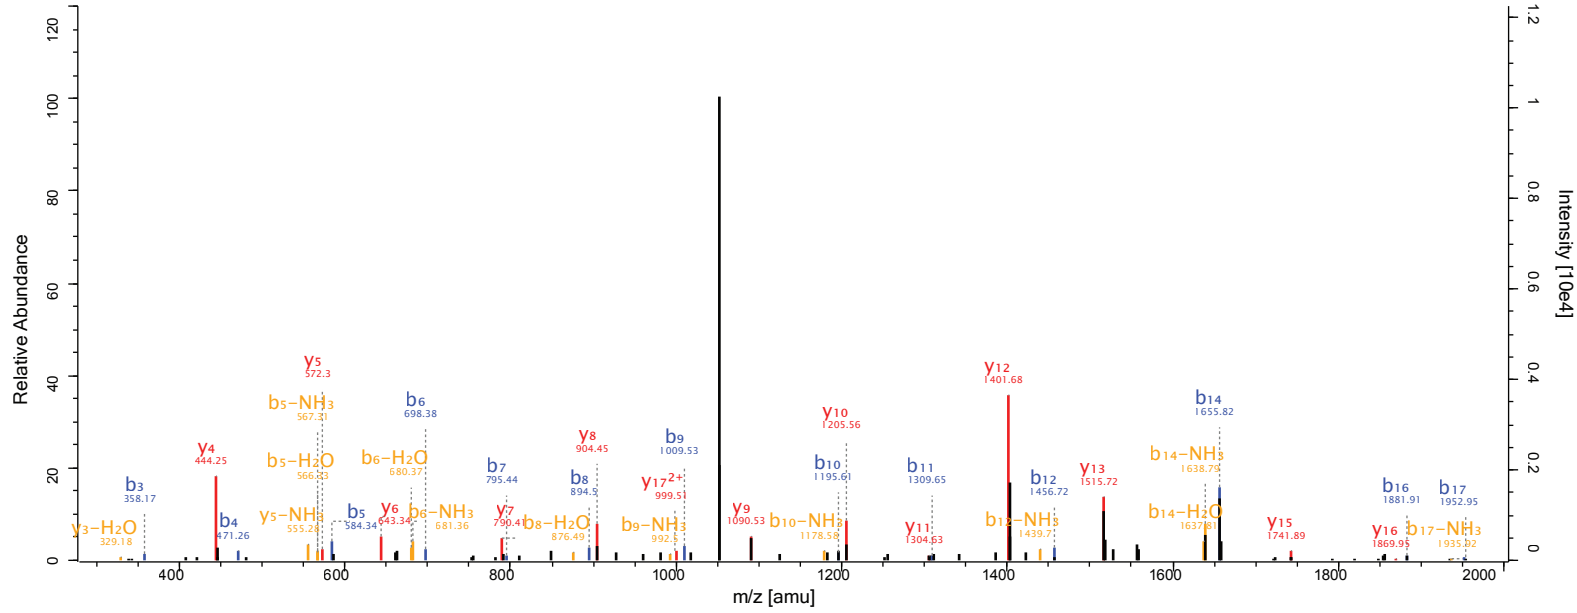

Scan number 2757 Raw file SP\_120724\_81  
 Method ITMS; CID Genenames COX17

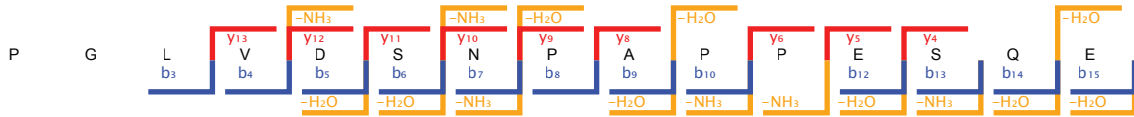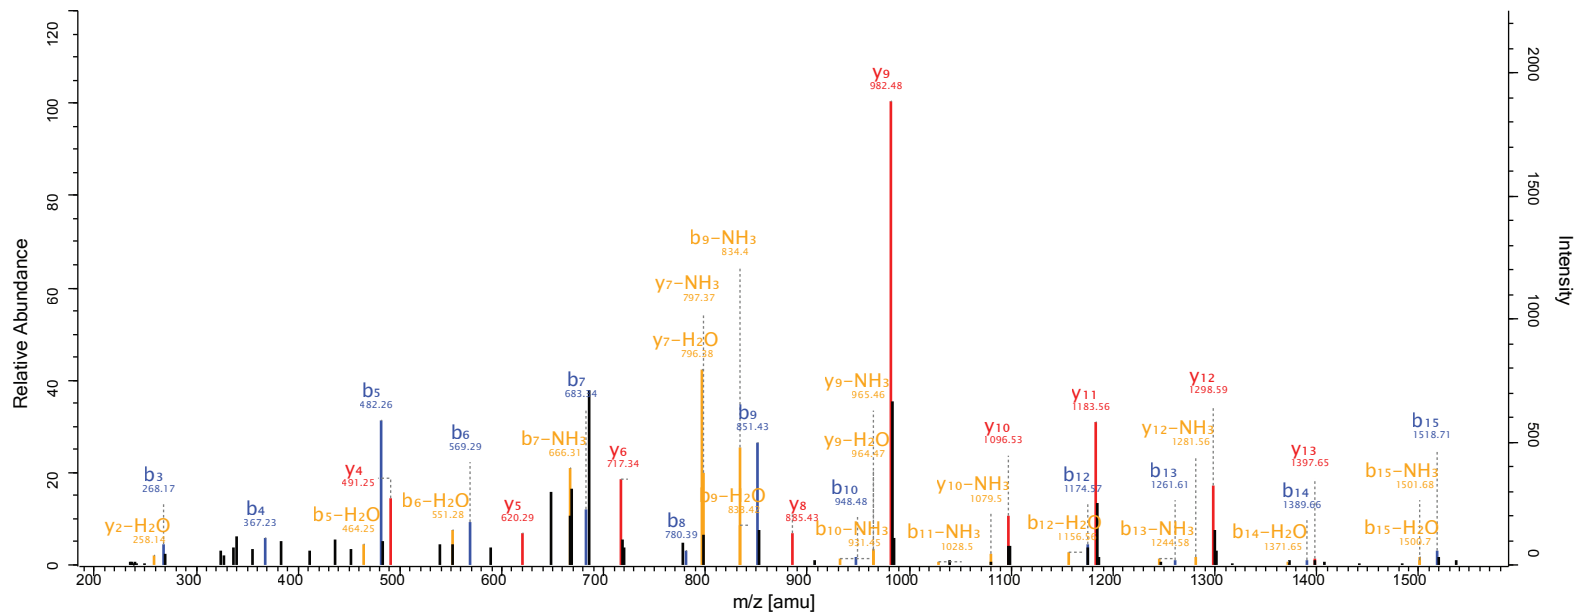

Scan number 2601 Raw file SP\_120724\_204  
 Method ITMS; CID Genenames CRLS1

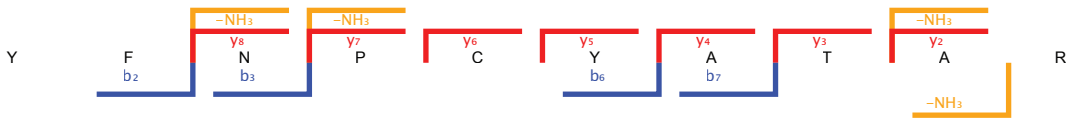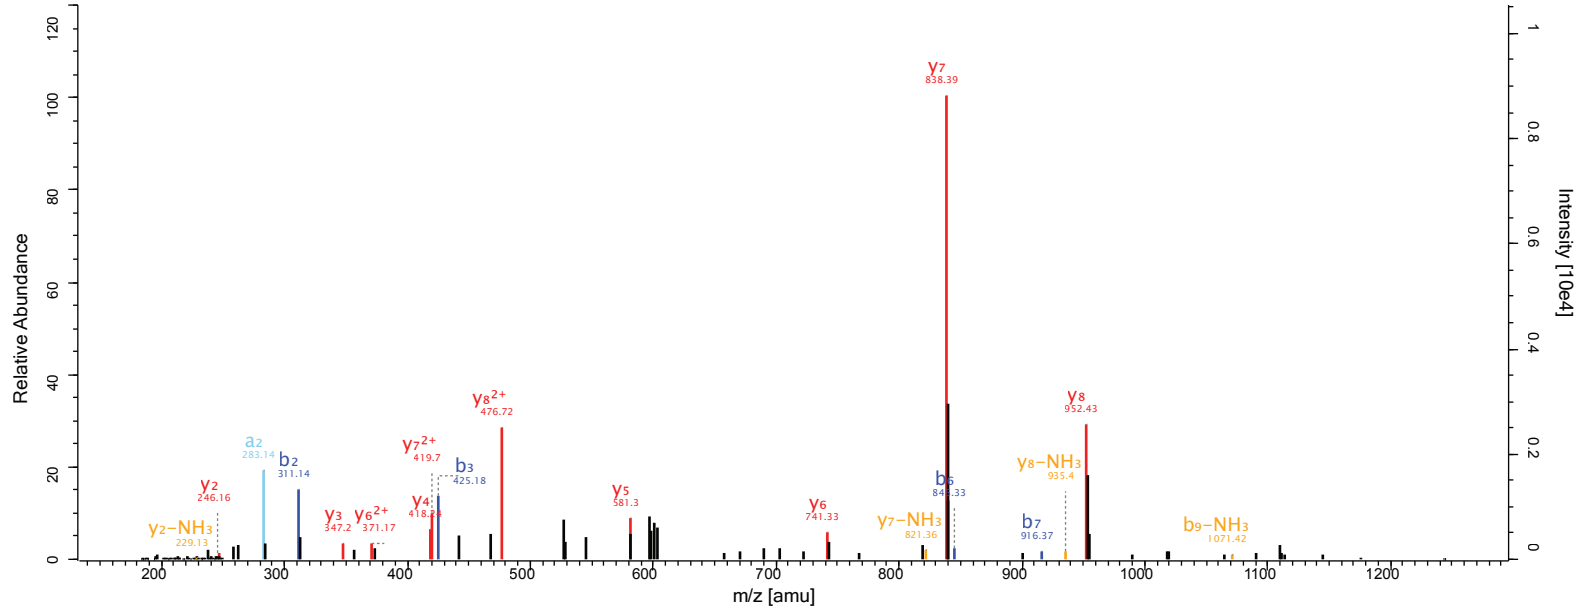

Scan number 1004 Raw file SP\_120724\_132  
 Method ITMS; CID Genenames CYB561

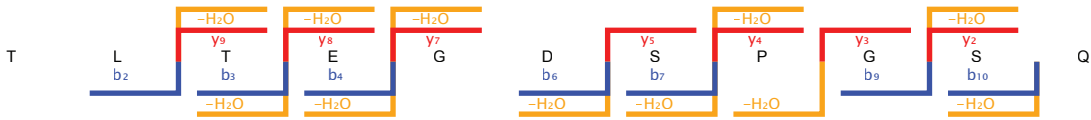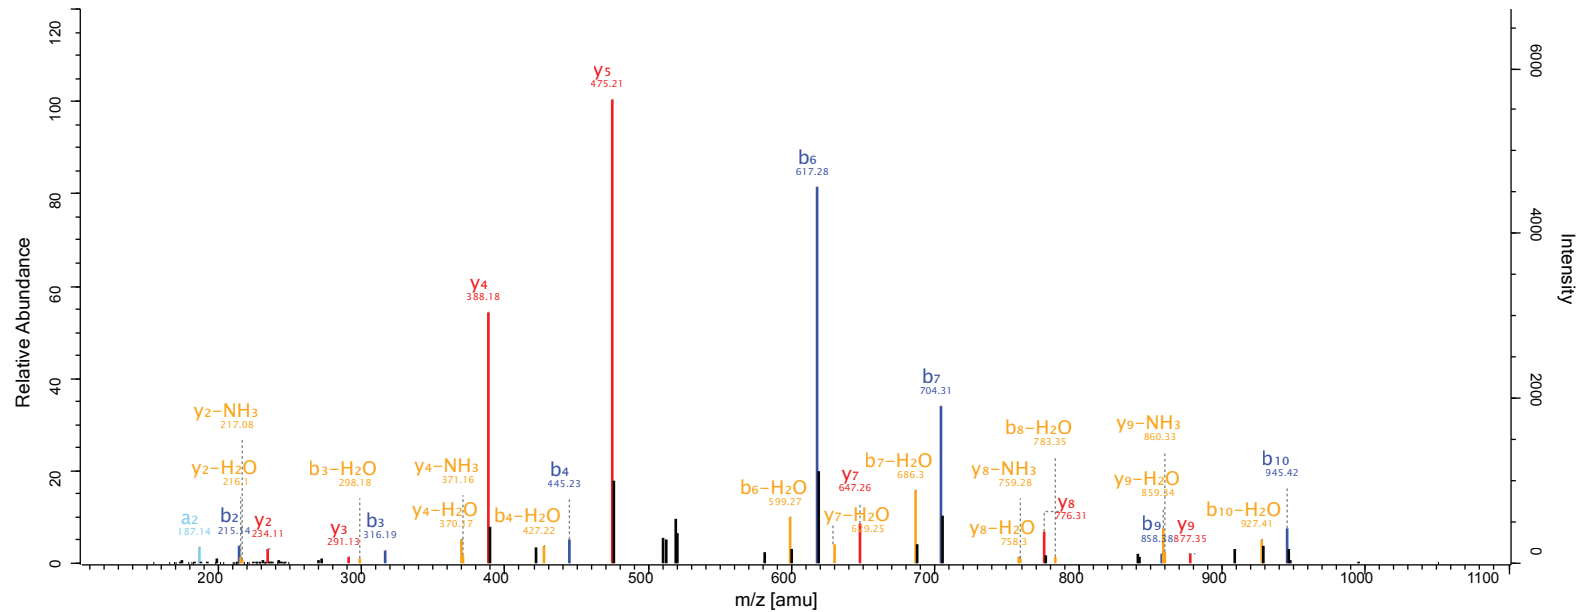

Scan number 3385 Raw file SP\_120724\_109  
 Method ITMS; CID Genenames CYB561D2

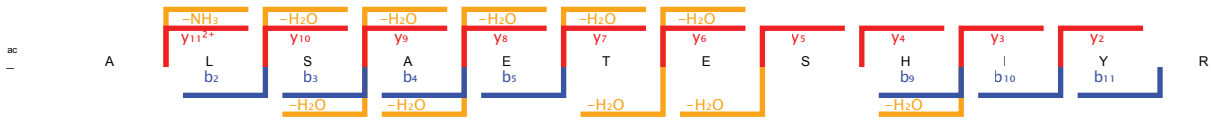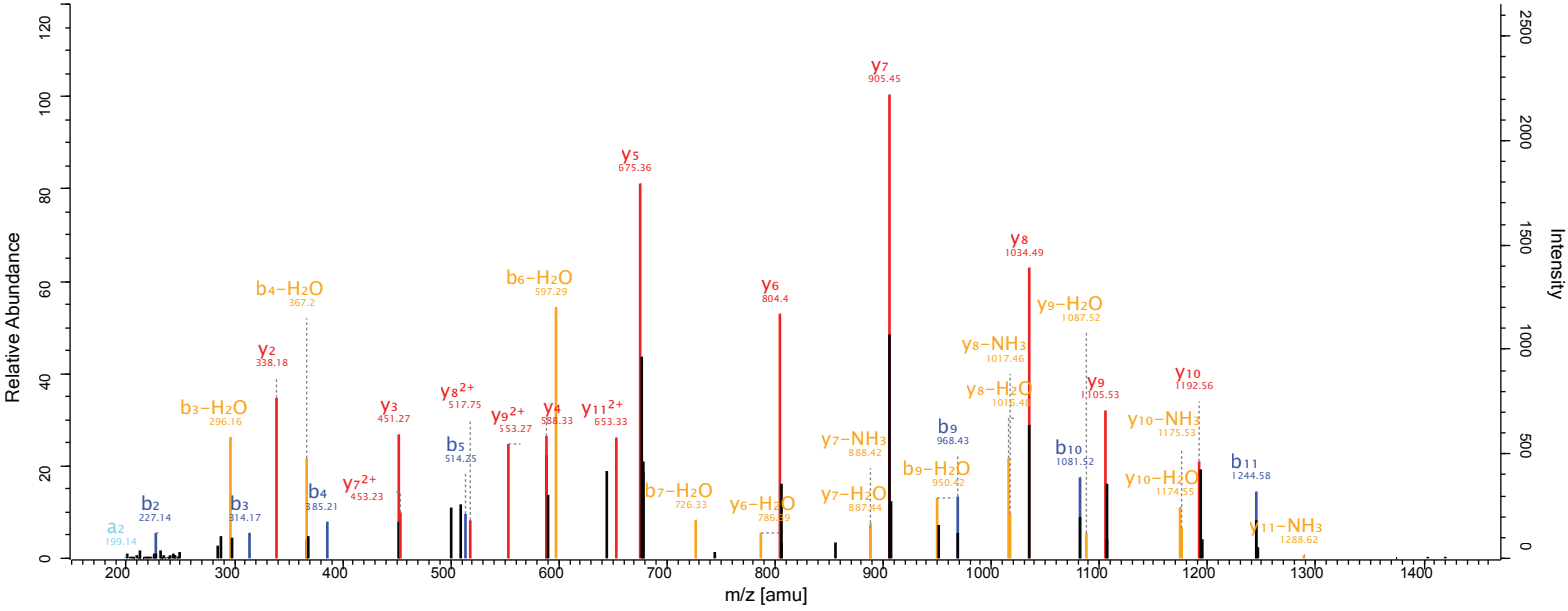

Scan number 5741 Raw file SP\_120724\_186  
 Method ITMS; CID Genenames EBP

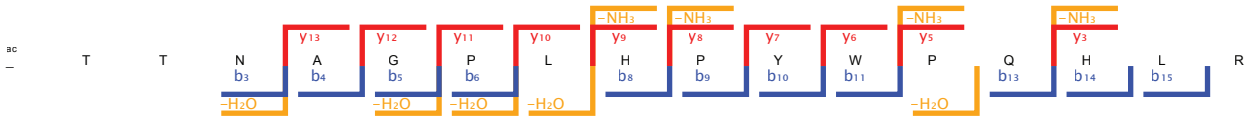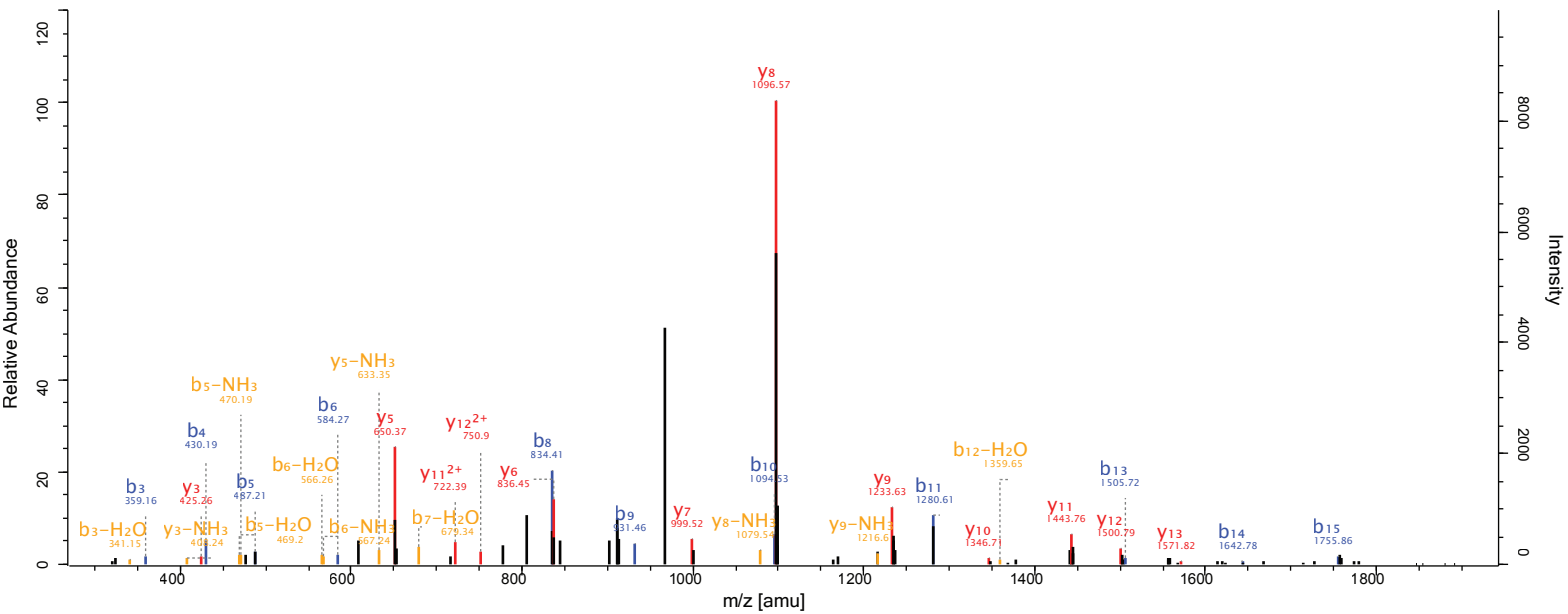

Scan number 5273 Raw file SP\_120724\_130  
 Method ITMS; CID Genenames FBLIM1

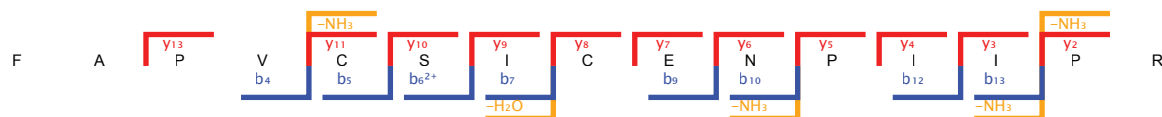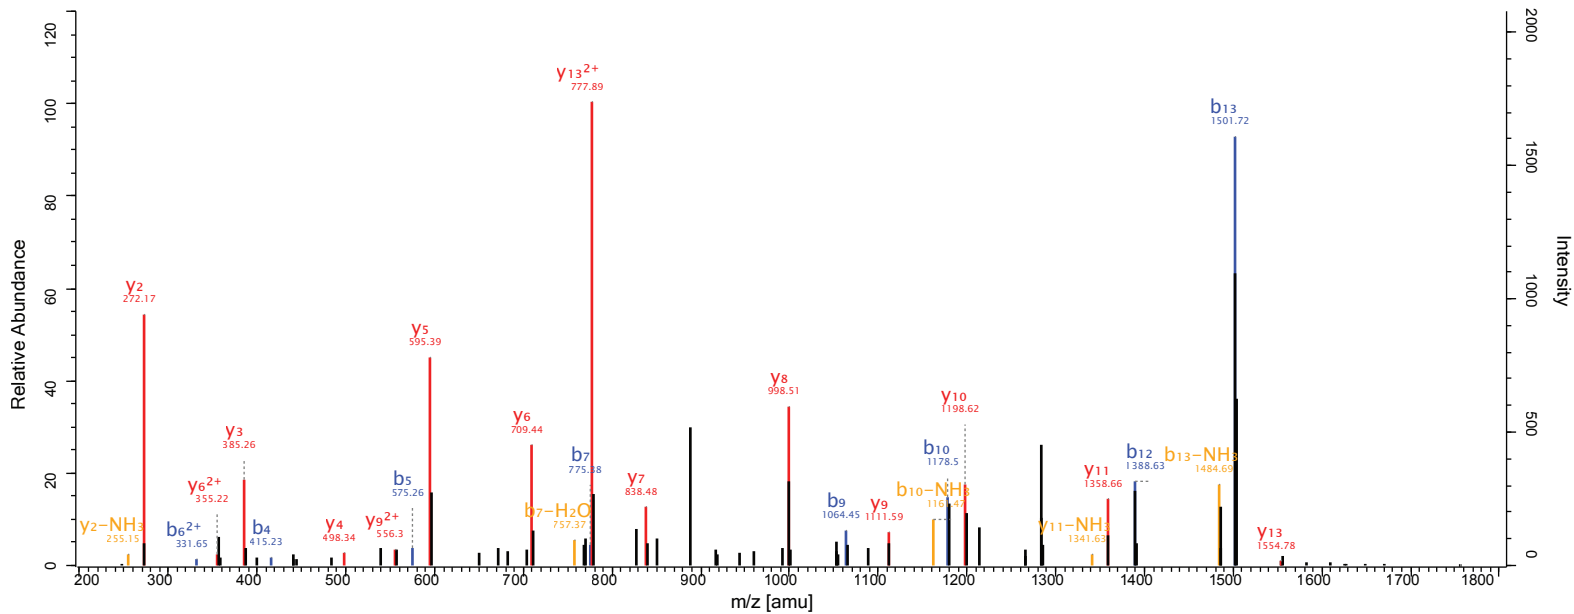

Scan number 4944 Raw file SP\_120724\_122  
 Method ITMS; CID Genenames FITM2

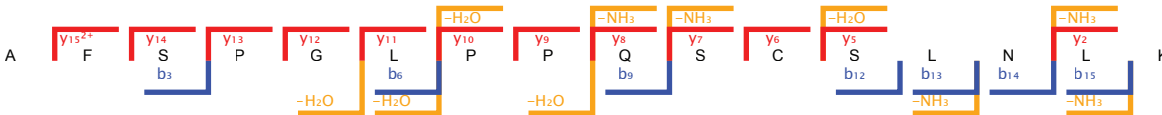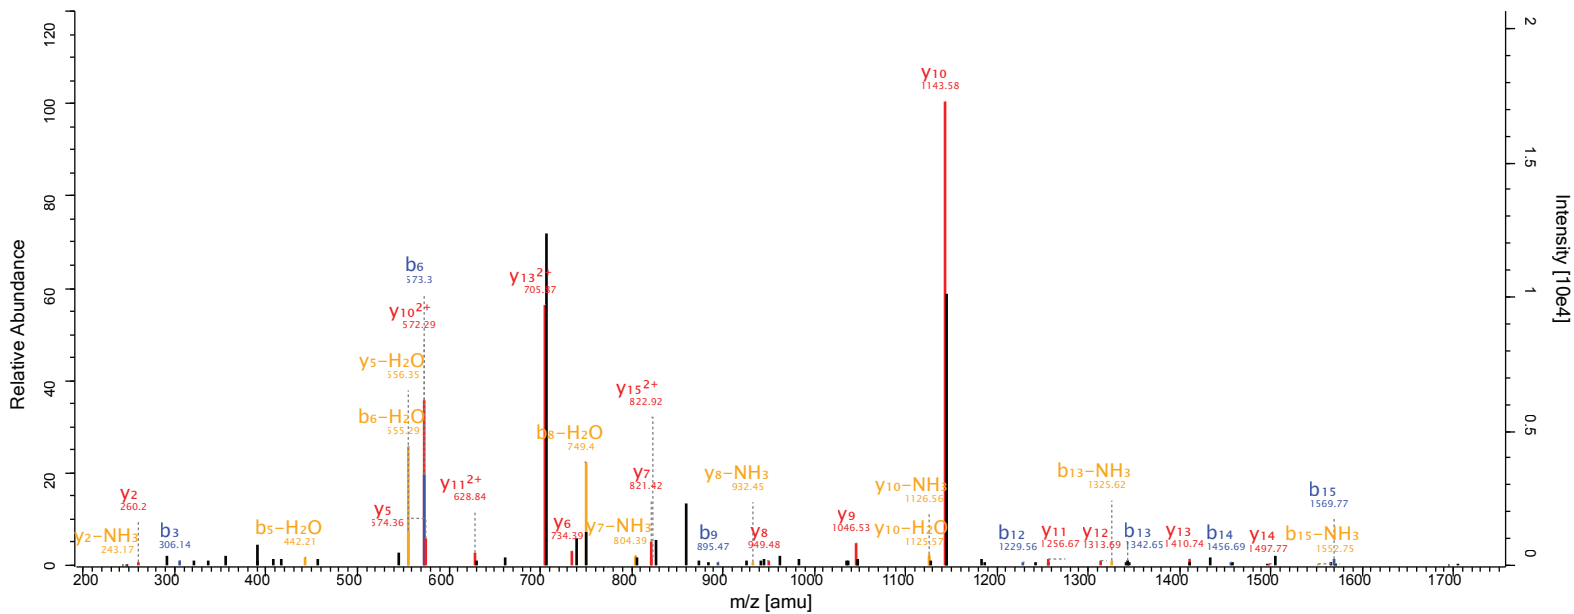



Scan number 4392 Raw file SP\_120724\_143  
 Method ITMS; CID Genenames FMO4

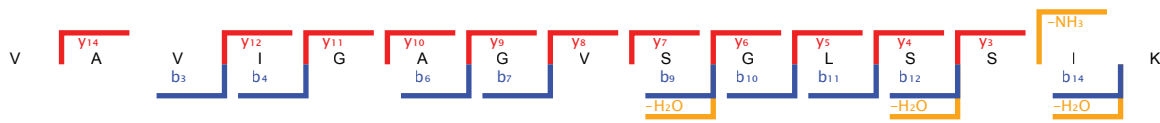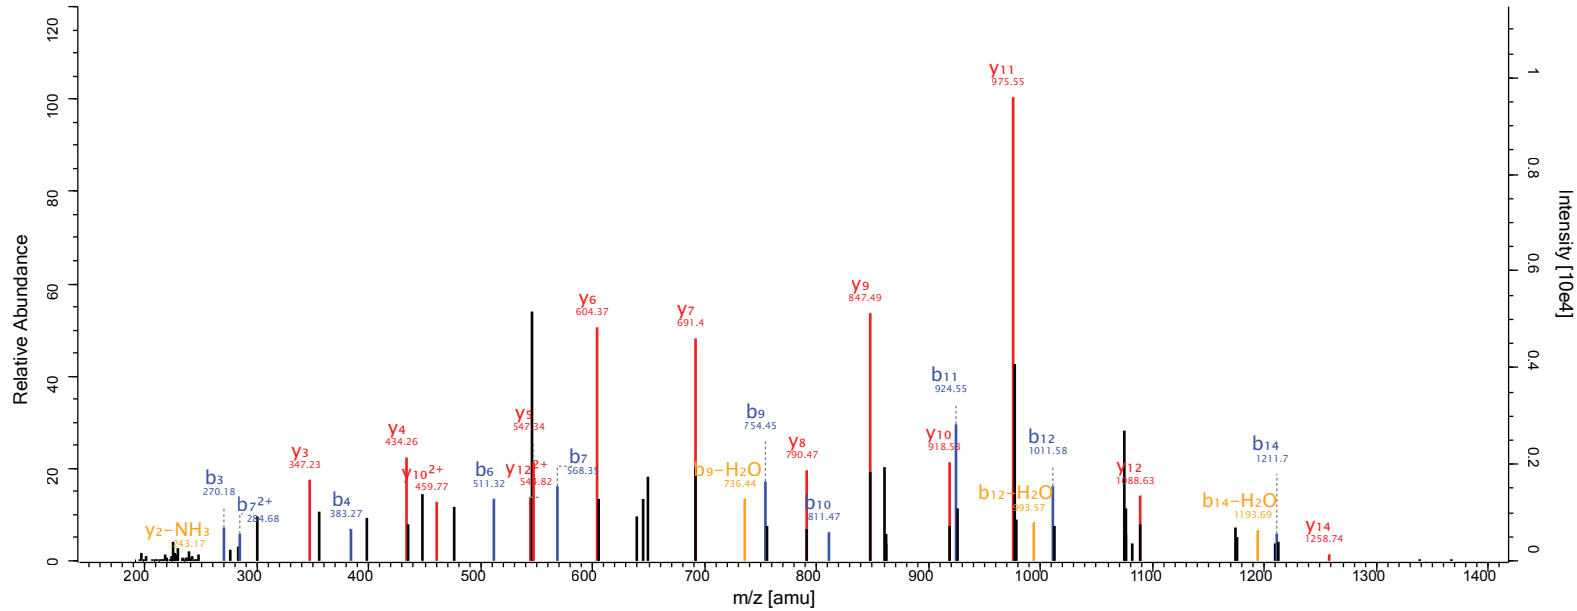

Scan number 2545 Raw file SP\_120724\_126  
 Method ITMS; CID Genenames FXYD3

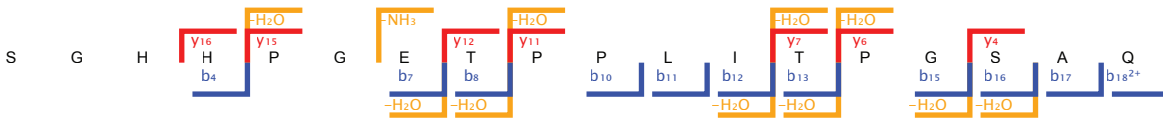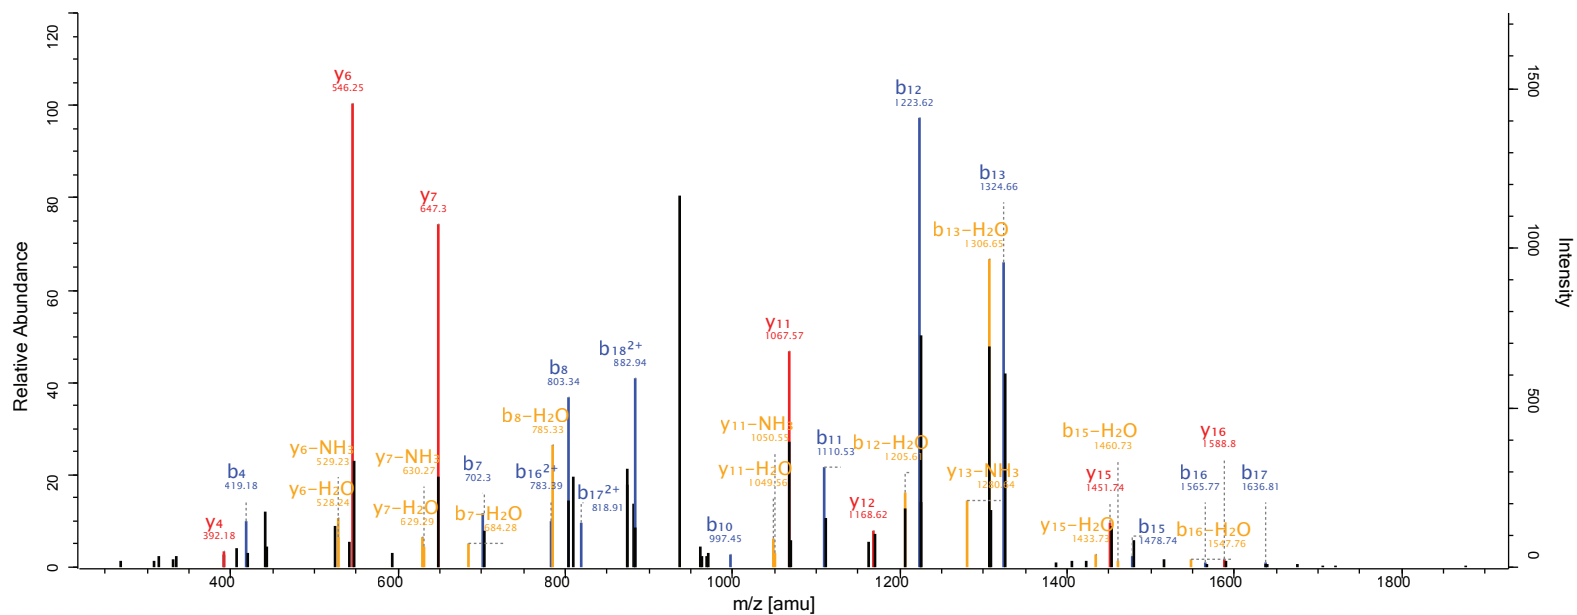

Scan number 6342 Raw file SP\_120724\_213  
 Method ITMS; CID Genenames GTPBP1

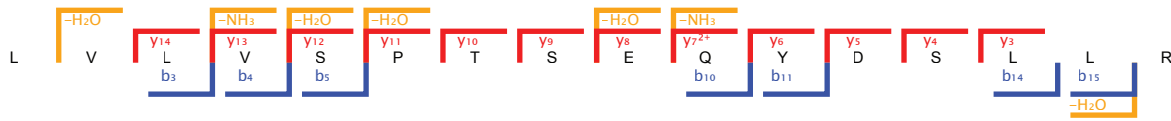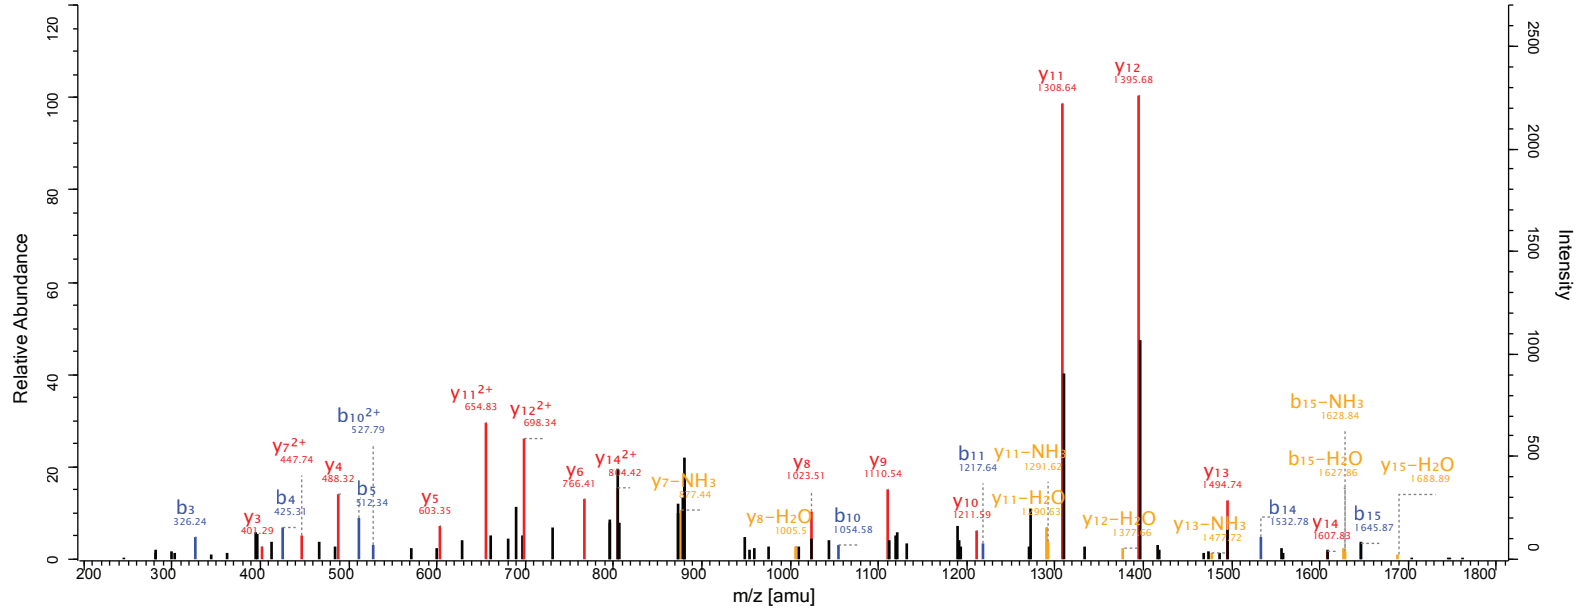

Scan number 3481 Raw file SP\_120724\_158  
 Method ITMS; CID Genenames H2AFZ;H2AFV

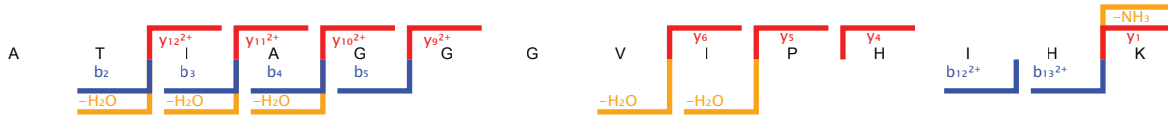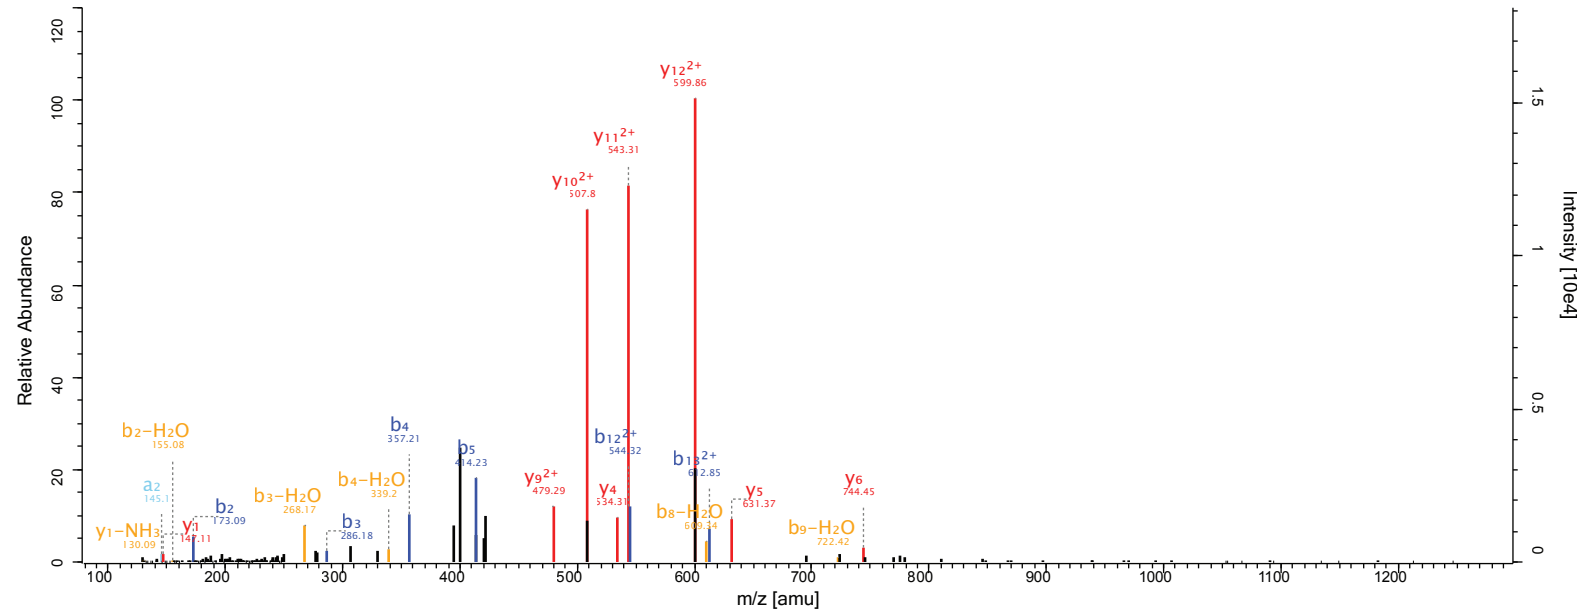

Scan number 970 Raw file SP\_120724\_165  
 Method ITMS; CID Genenames HTT

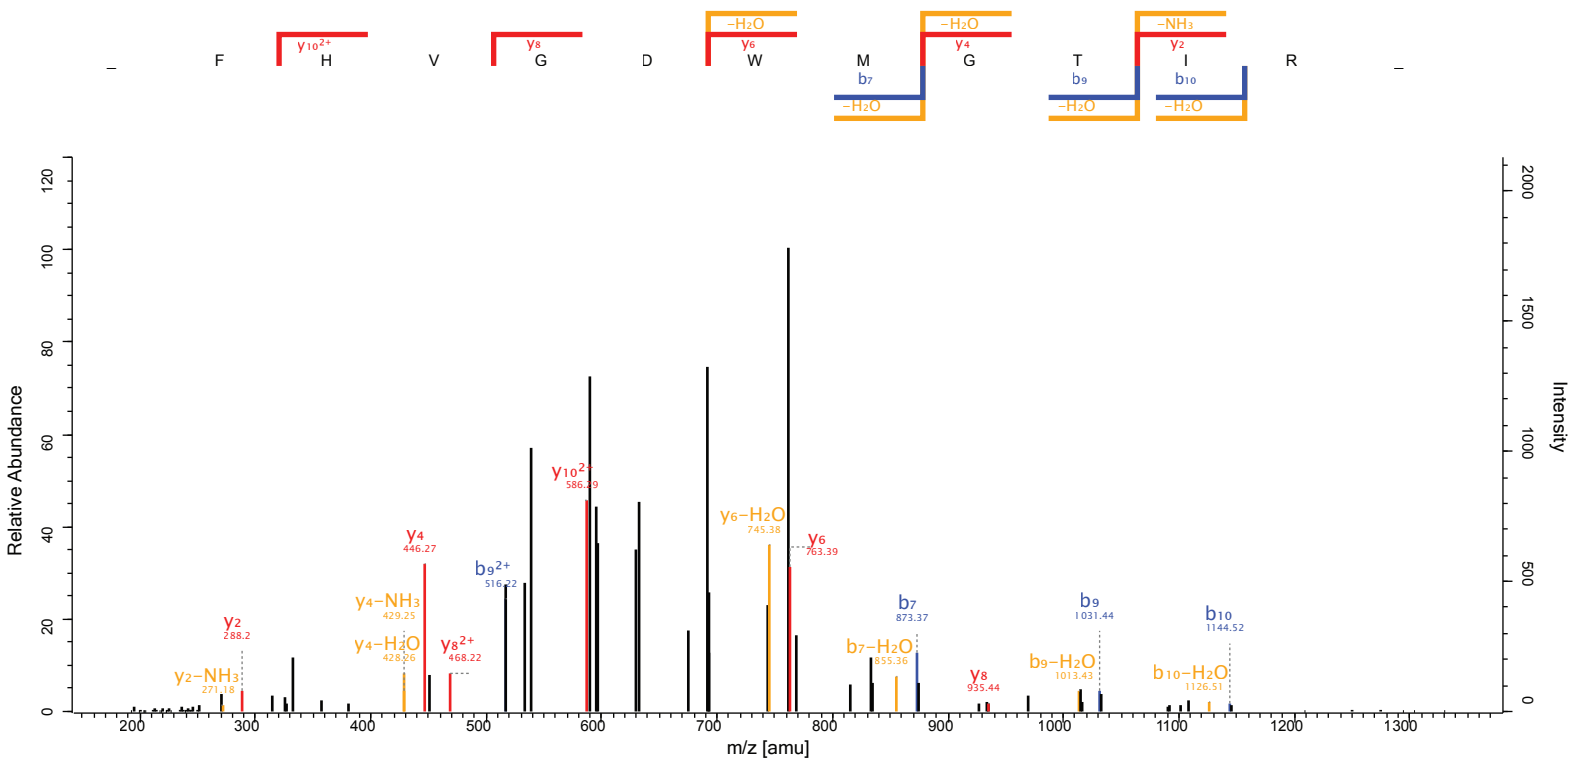

Scan number 5235 Raw file SP\_120724\_156  
 Method ITMS; CID Genenames ICMT

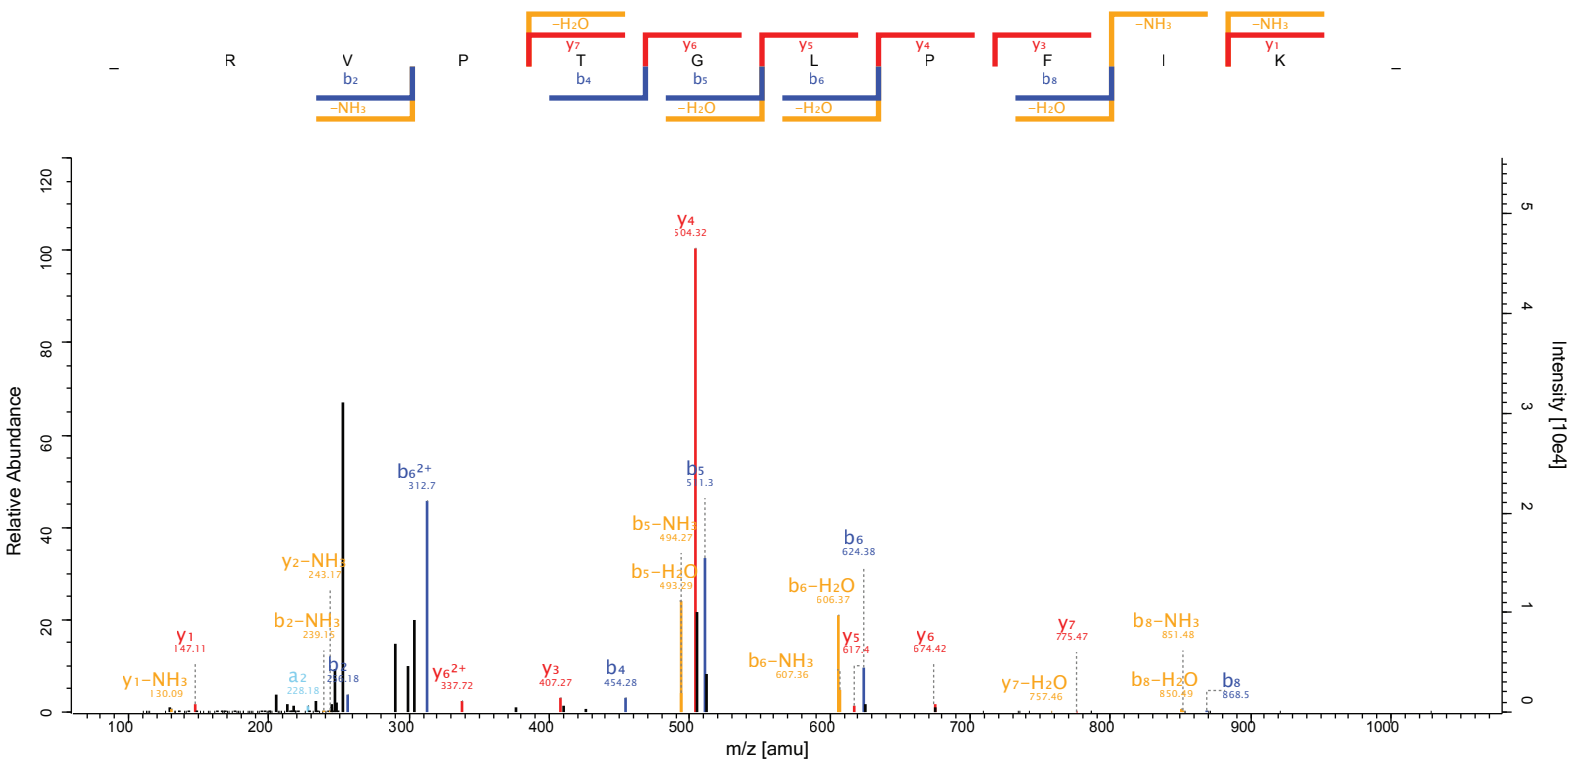

Scan number 7842 Raw file SP\_120724\_156  
 Method ITMS; CID Genenames IGHG4

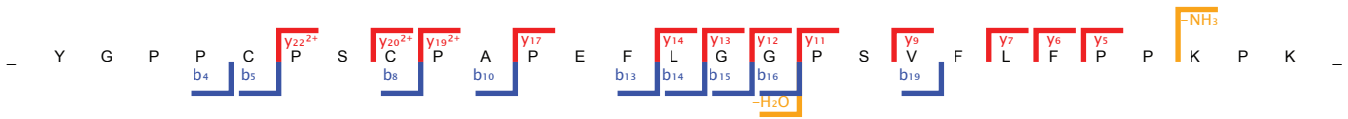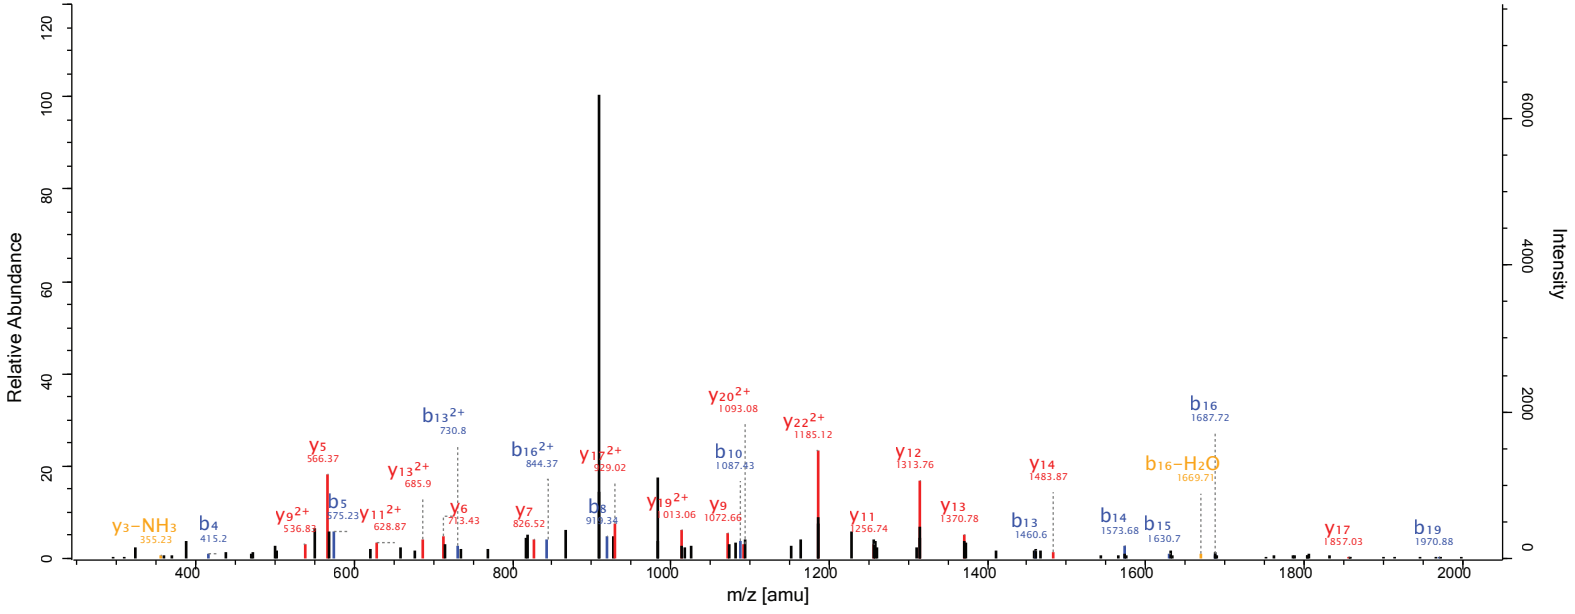

Scan number 7893 Raw file SP\_120724\_194  
 Method ITMS; CID Genenames KRAS

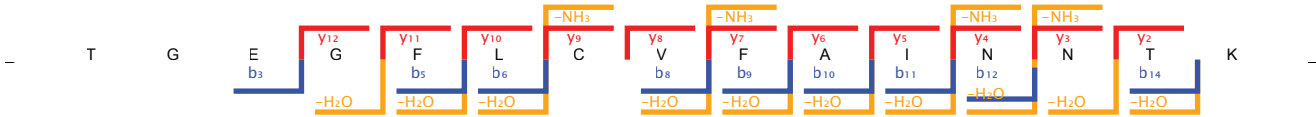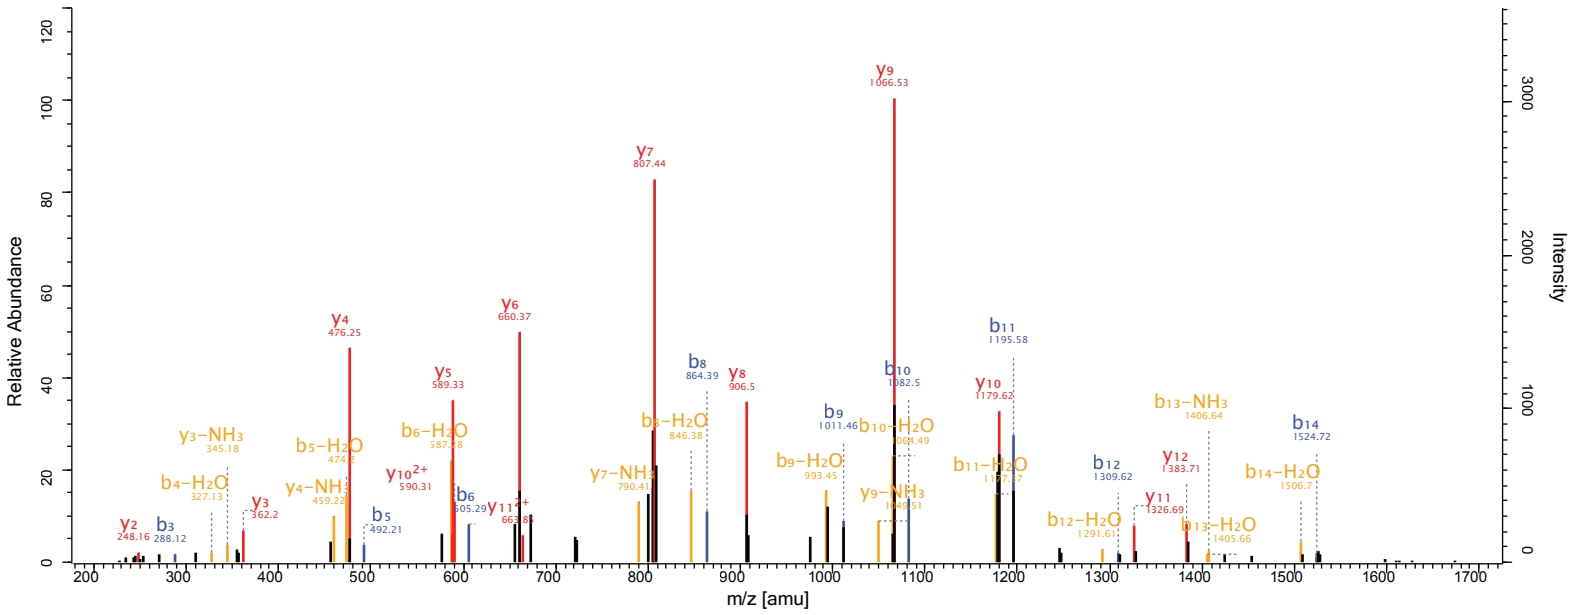

Scan number 6616 Raw file SP\_120724\_89  
 Method ITMS; CID Genenames KRTCAP2

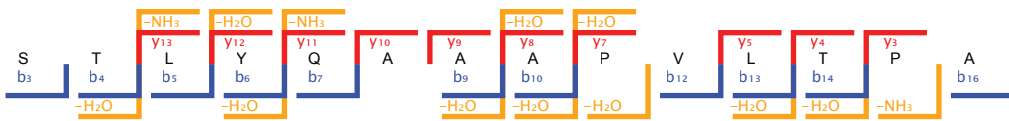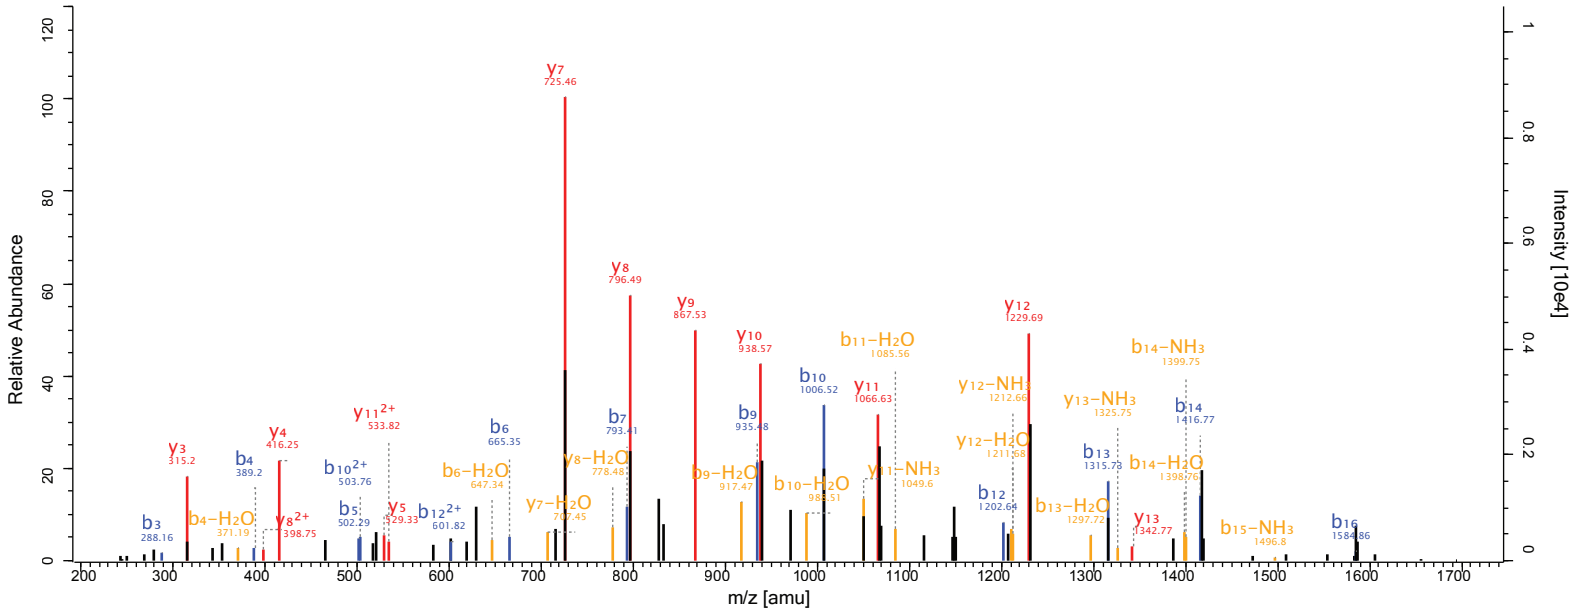

Scan number 983 Raw file SP\_120724\_179  
 Method ITMS; CID Genenames MFSD9

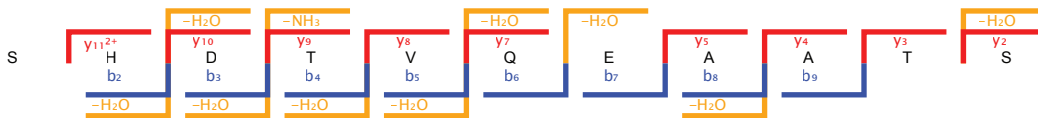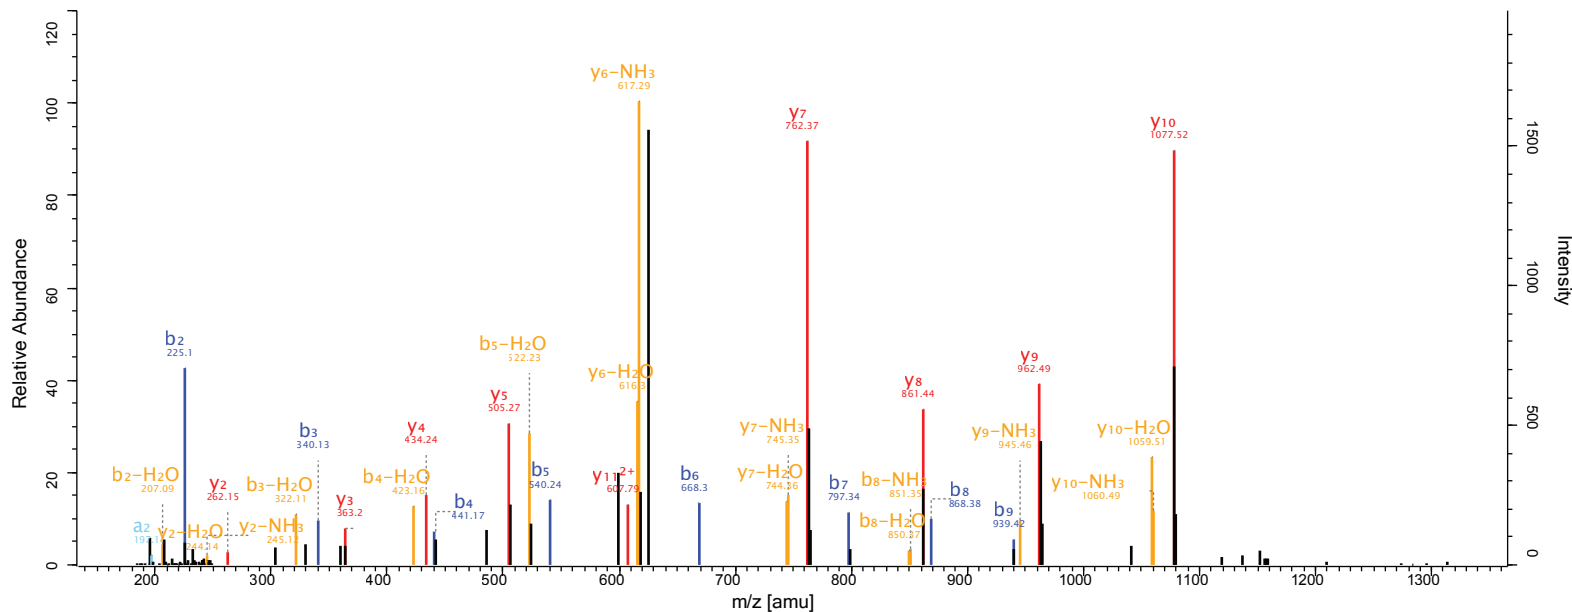

Scan number 2815 Raw file SP\_120724\_166  
 Method ITMS; CID Genenames MOGAT3

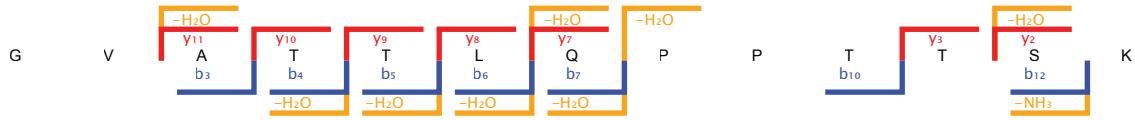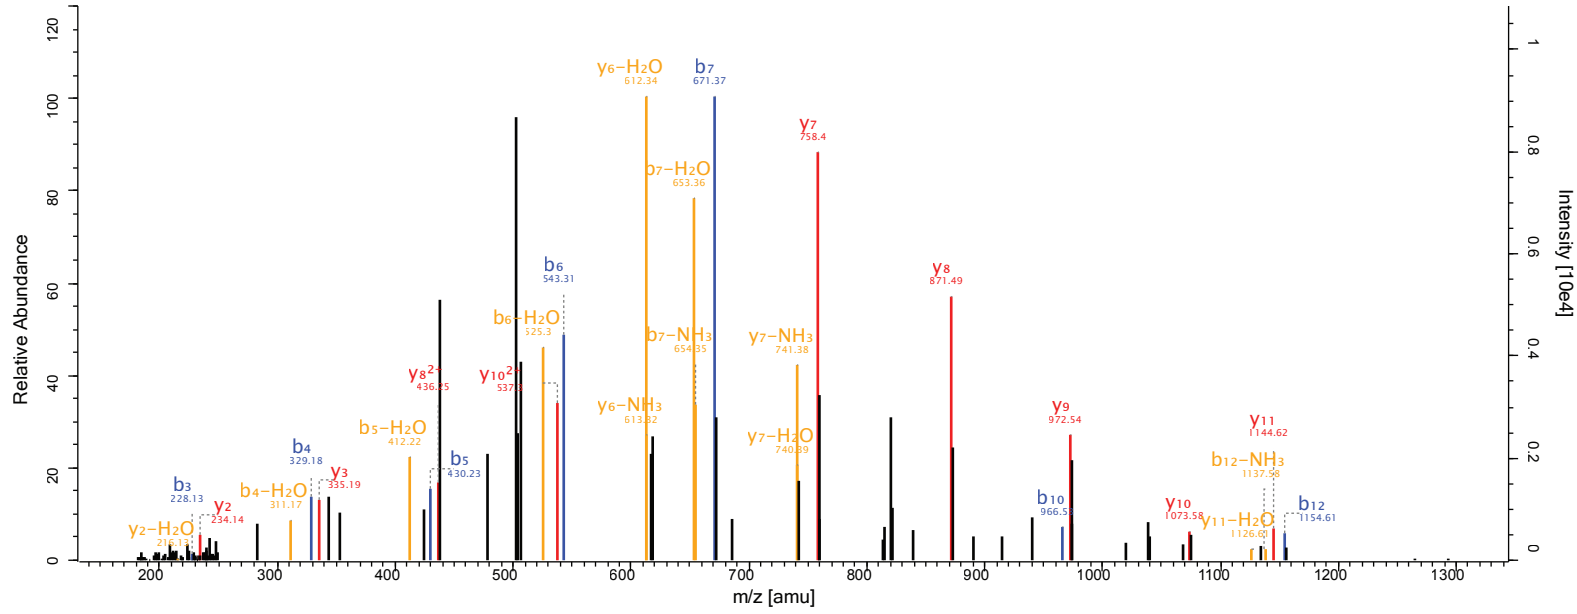

Scan number 5865 Raw file SP\_120724\_213  
 Method ITMS; CID Genenames MRPS14

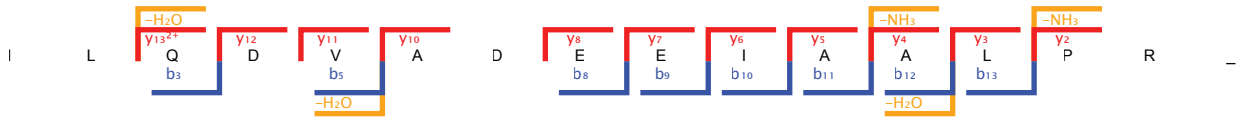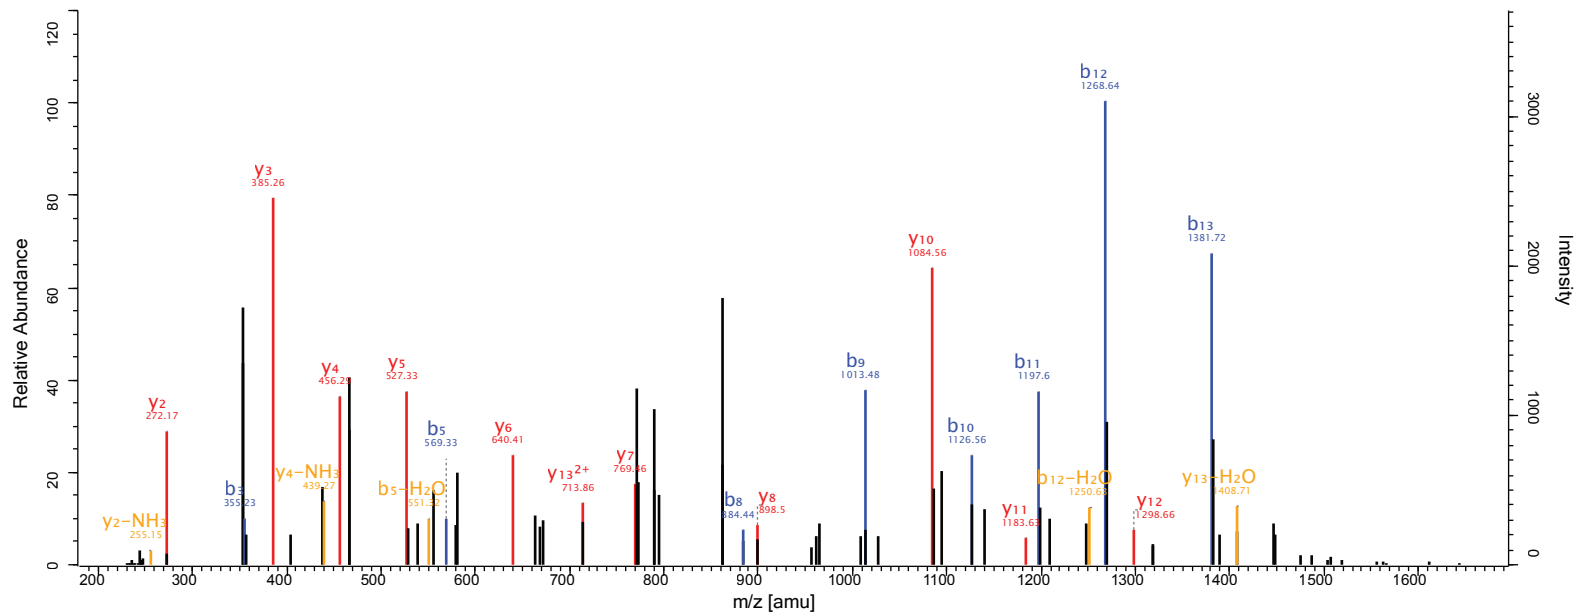

Scan number 1580 Raw file SP\_120724\_112  
 Method ITMS; CID Genenames NOMO1

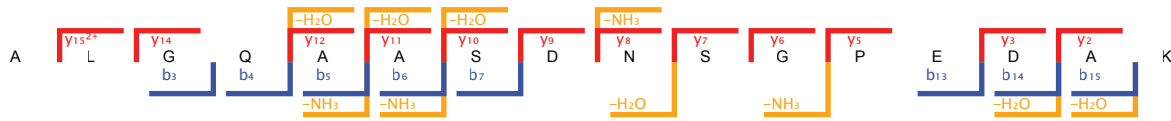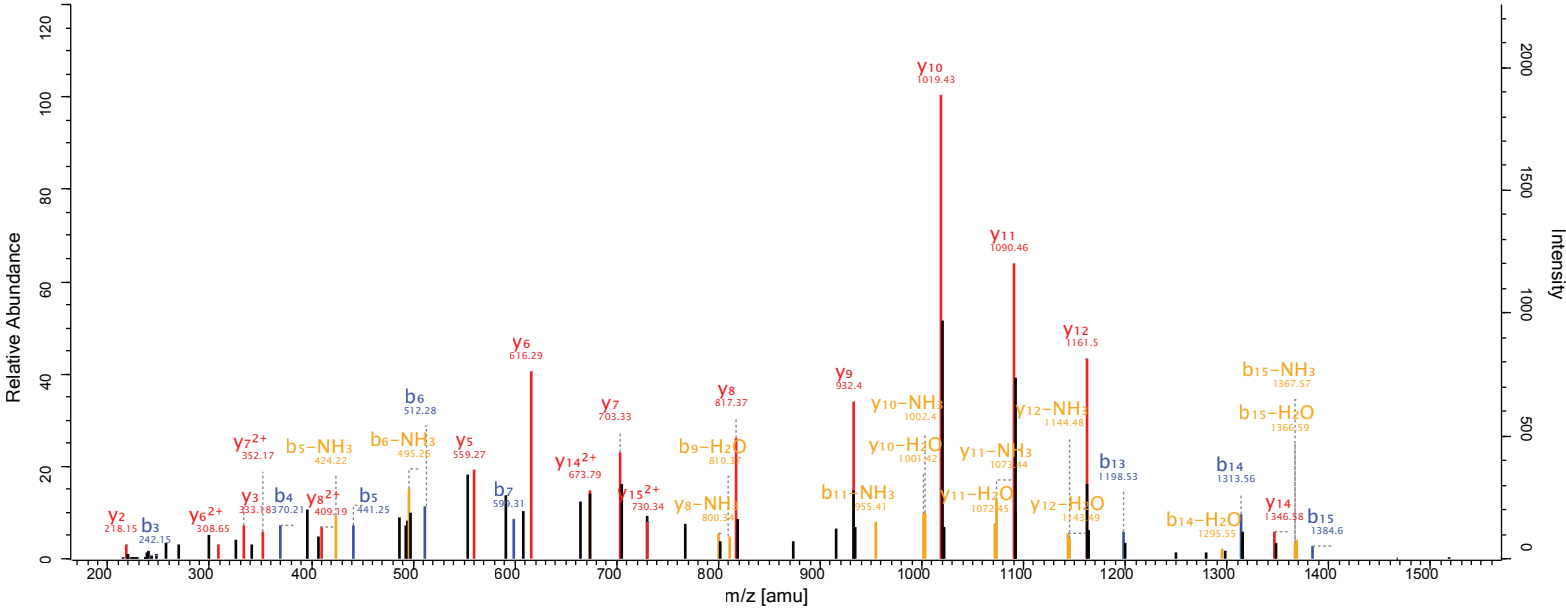

Scan number 3306 Raw file SP\_120724\_216  
 Method ITMS; CID Genenames ORMDL2;ORMDL1

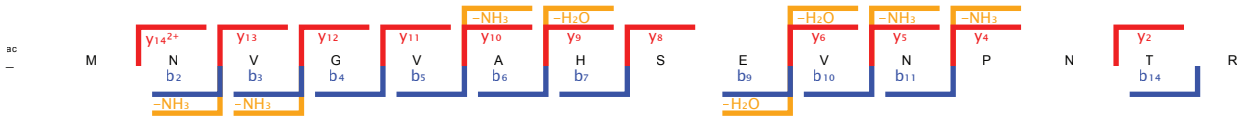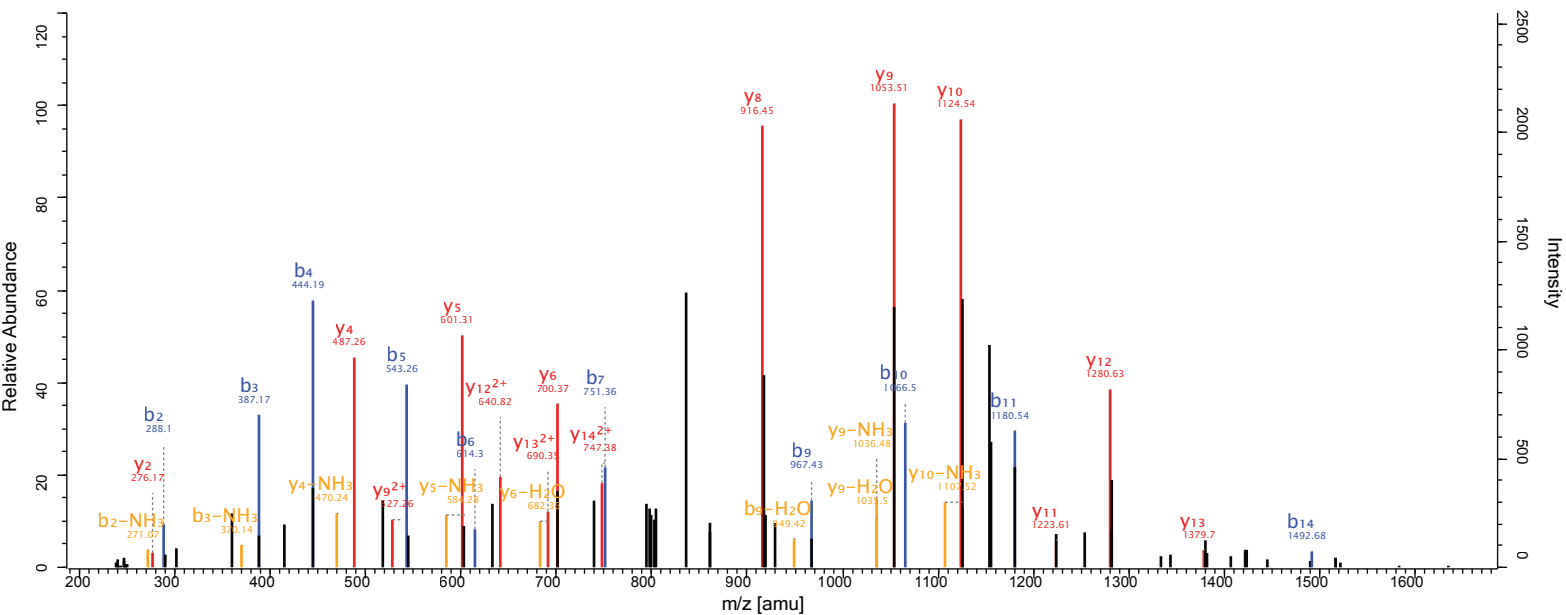

Scan number 2683 Raw file SP\_120724\_134  
 Method ITMS; CID Genenames ORMDL3

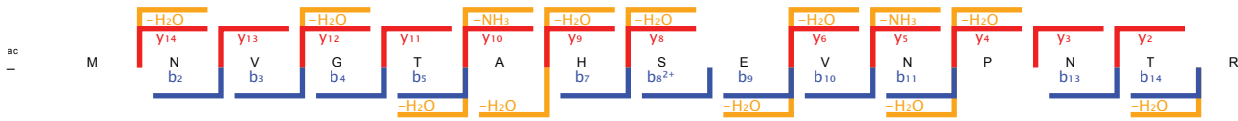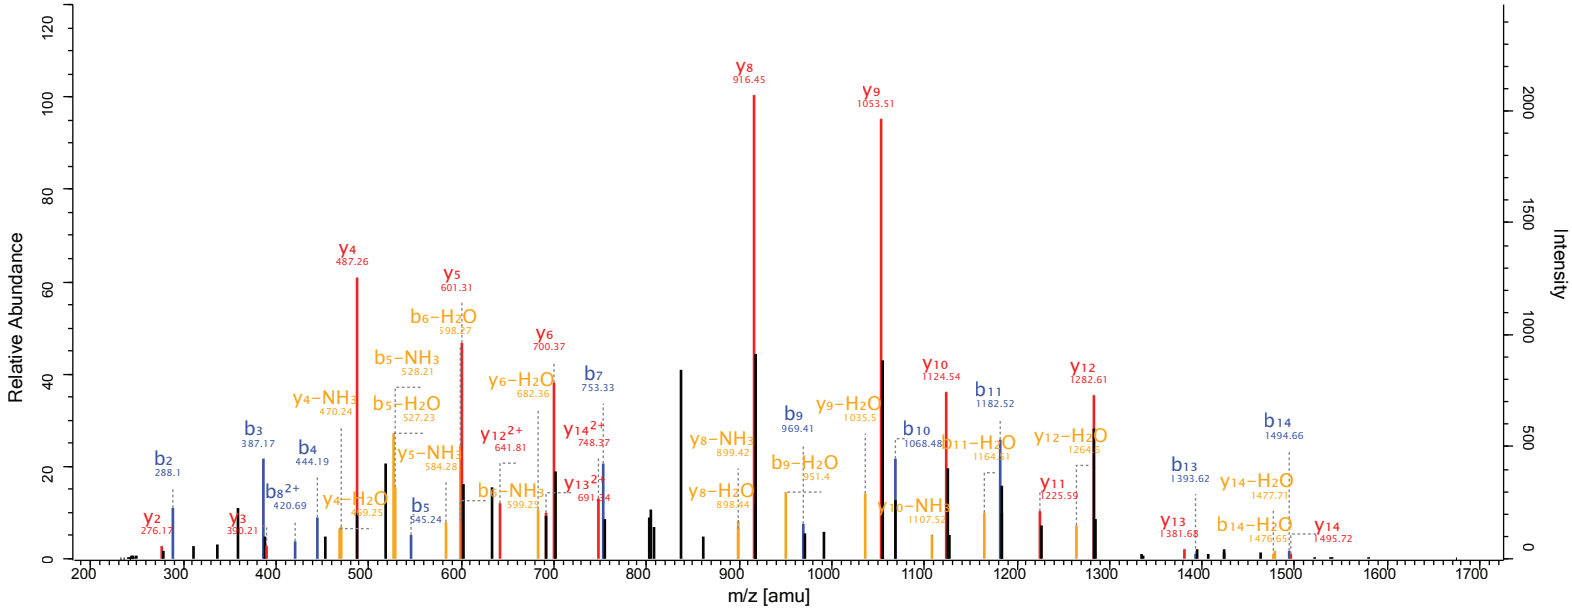

Scan number 5048 Raw file SP\_120724\_79  
 Method ITMS; CID Genenames PRAF2

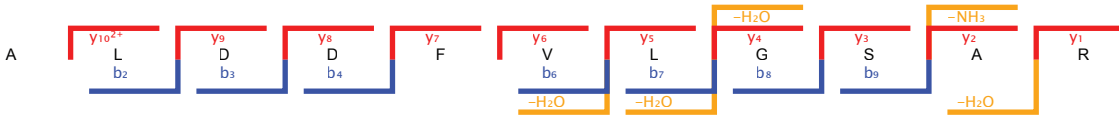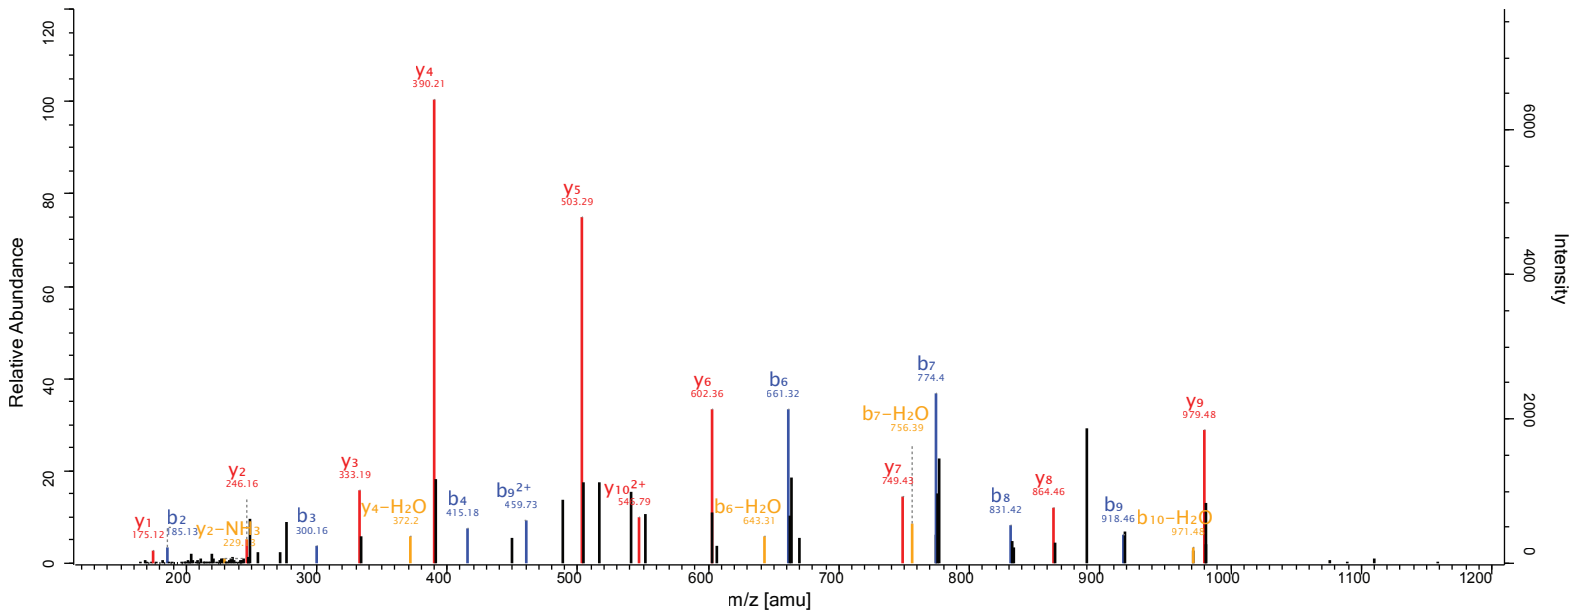



Scan number 2885 Raw file SP\_120724\_99  
 Method ITMS; CID Genenames PVR

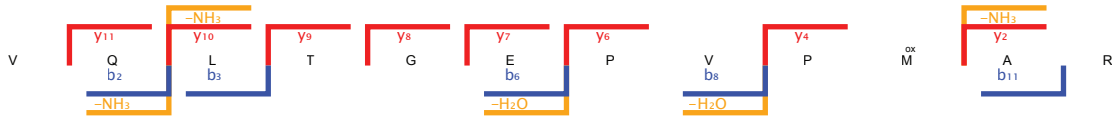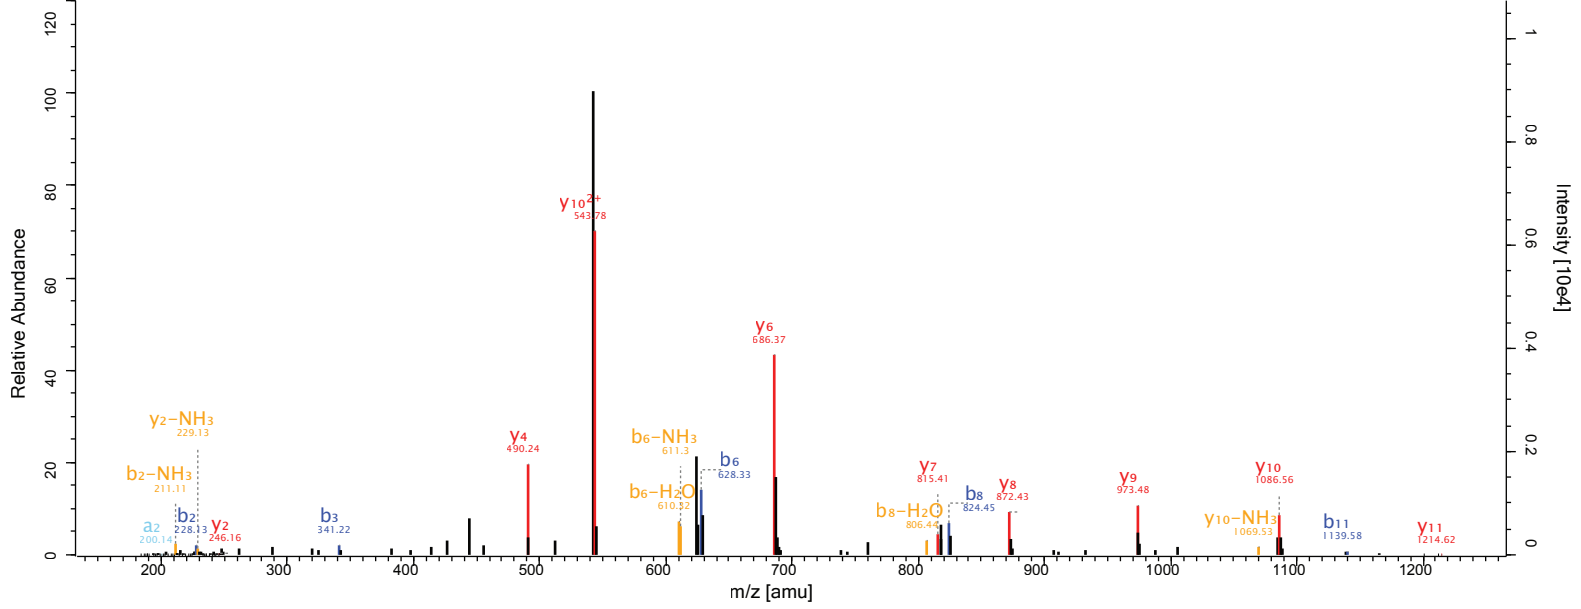

Scan number 736 Raw file SP\_120724\_147  
 Method ITMS; CID Genenames SERBP1

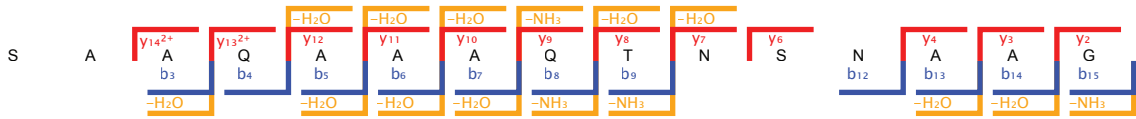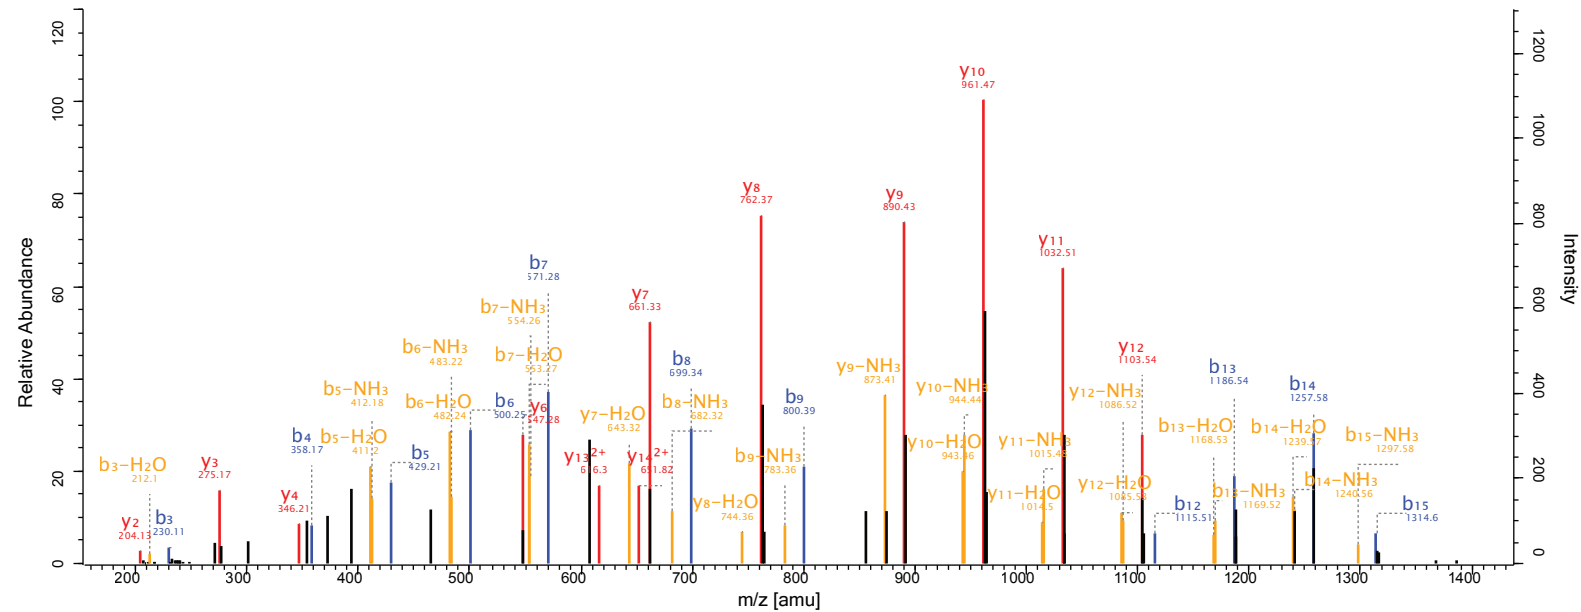

Scan number 4032 Raw file SP\_120724\_135  
 Method ITMS; CID Genenames SERINC3

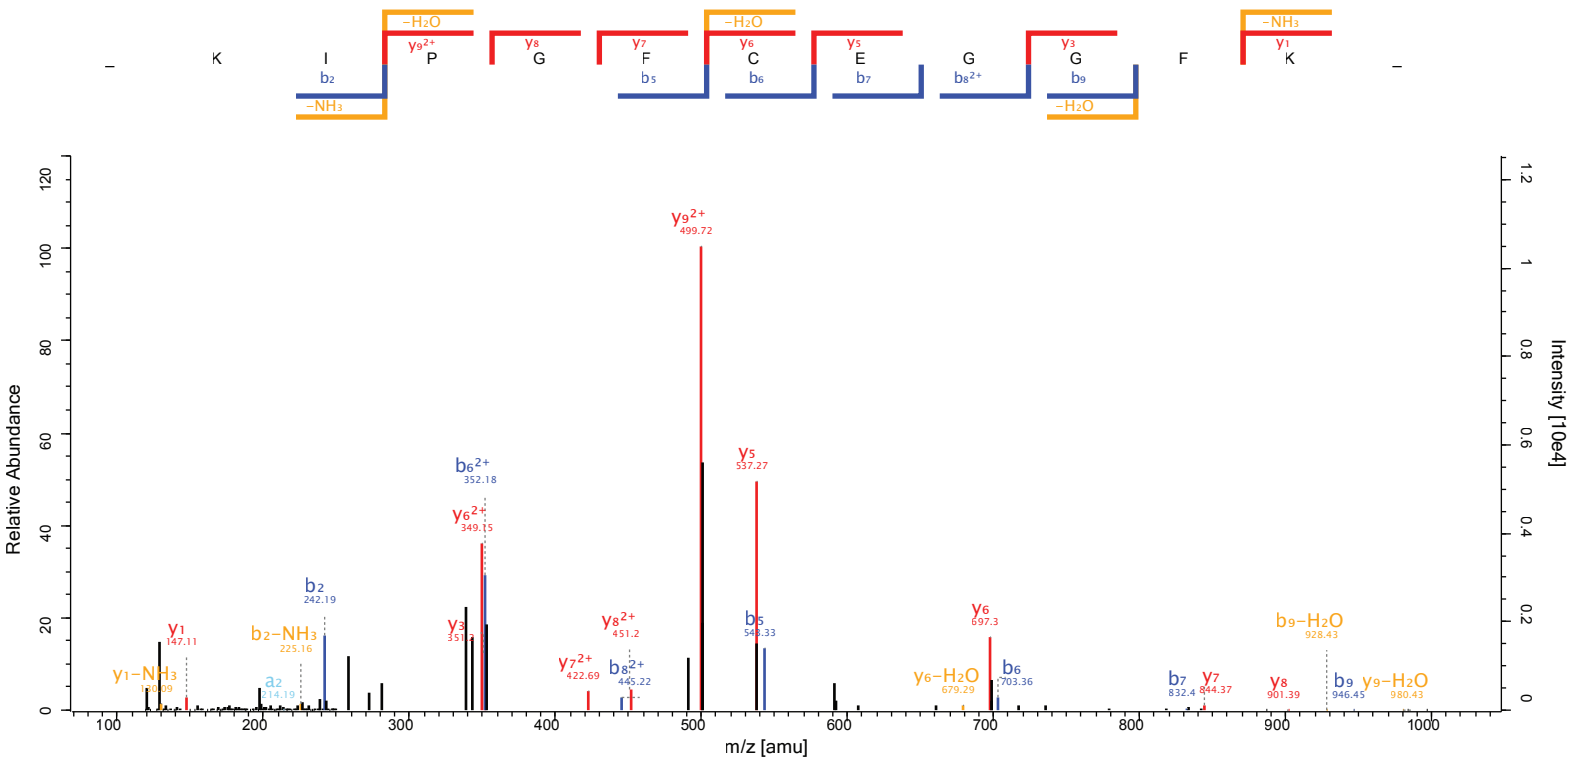

Scan number 5705 Raw file SP\_120724\_176  
 Method ITMS; CID Genenames SLC6A9

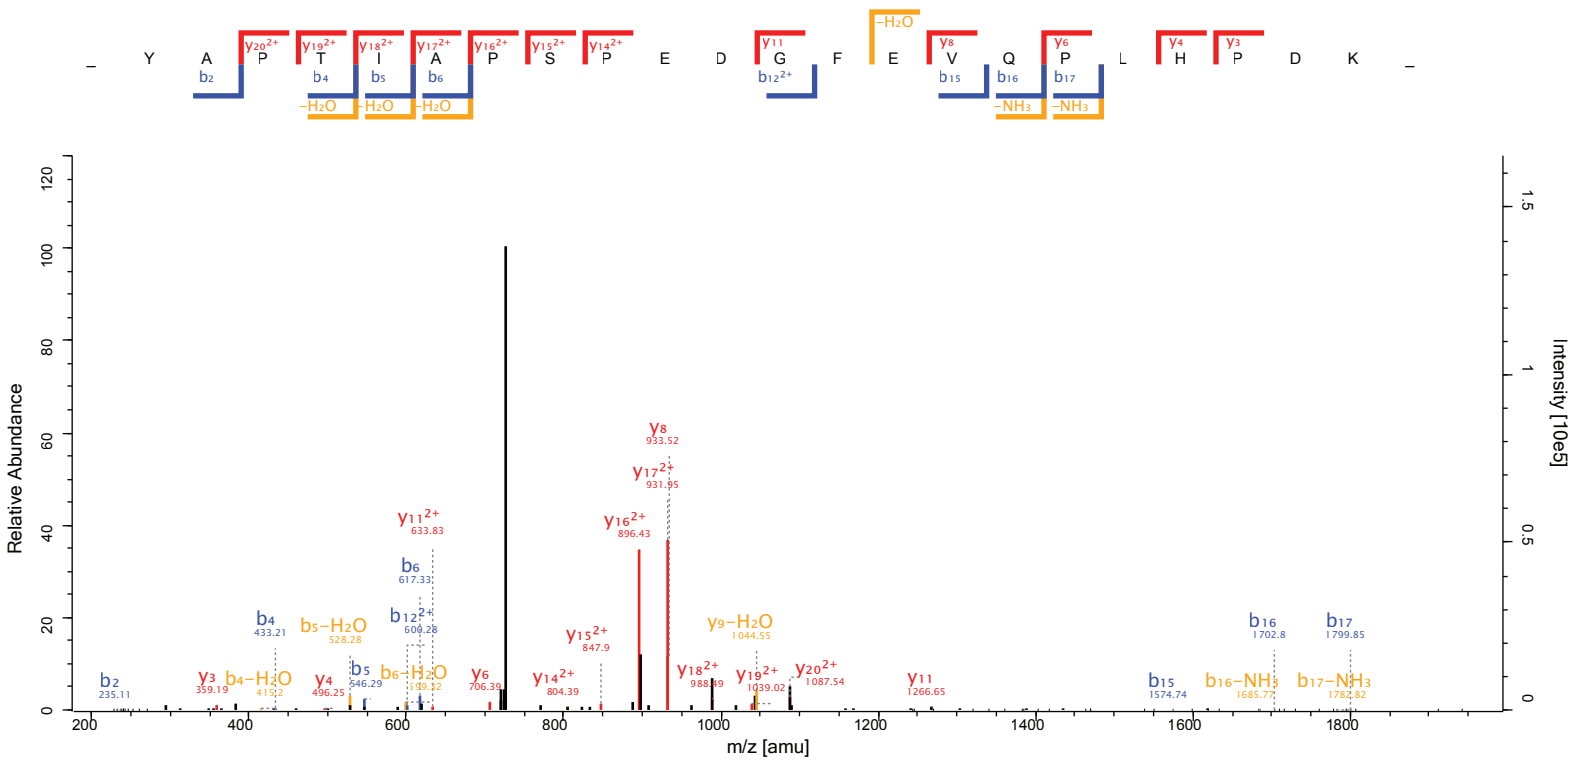

Scan number 4267 Raw file SP\_120724\_70  
 Method ITMS; CID Genenames SLC30A5

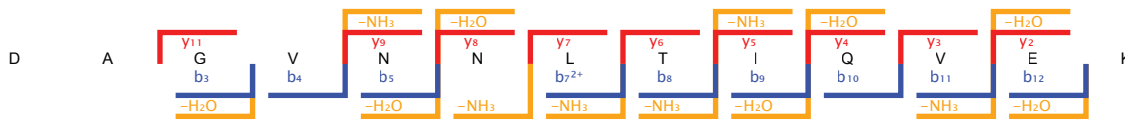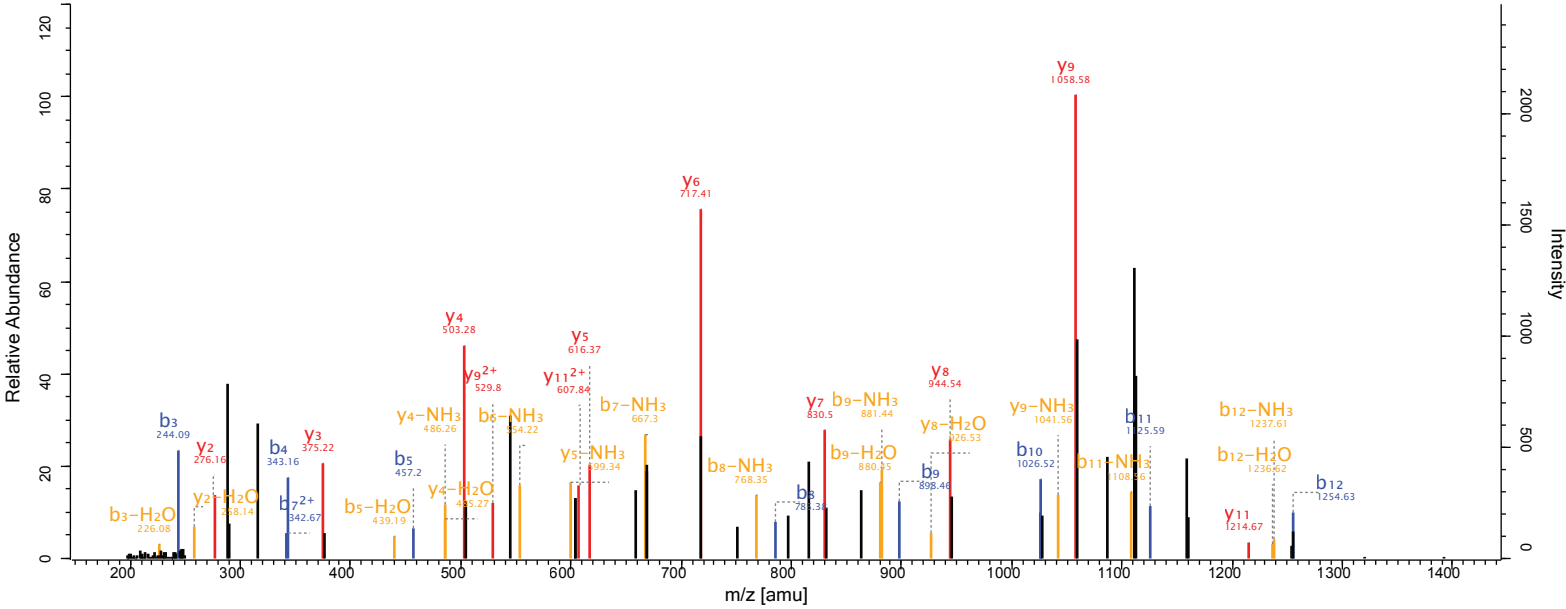

Scan number 6662 Raw file SP\_120724\_89  
 Method ITMS; CID Genenames SLC39A4

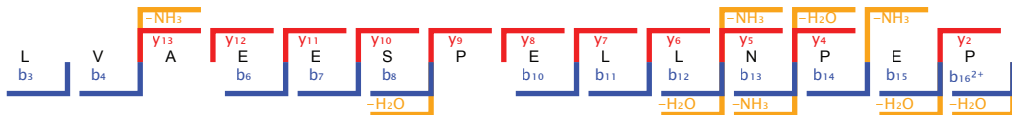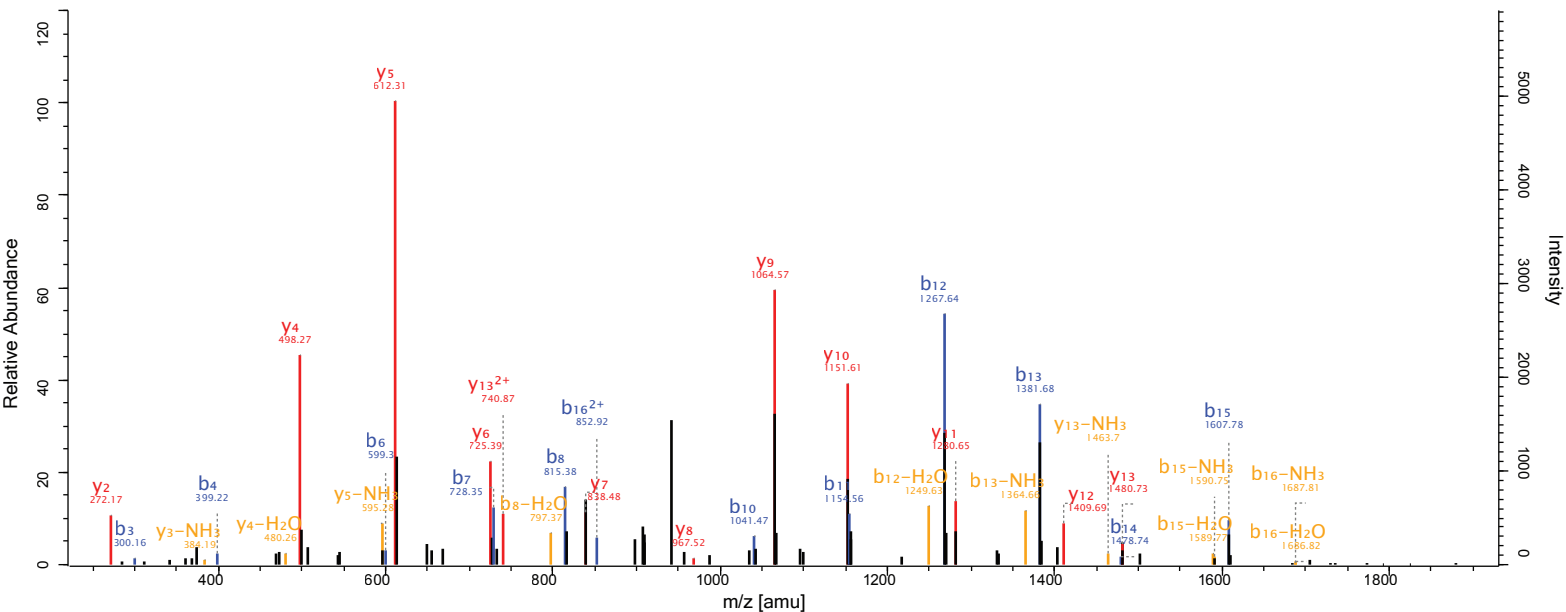

Scan number 1046 Raw file SP\_120724\_158  
 Method ITMS; CID Genenames SLC39A7

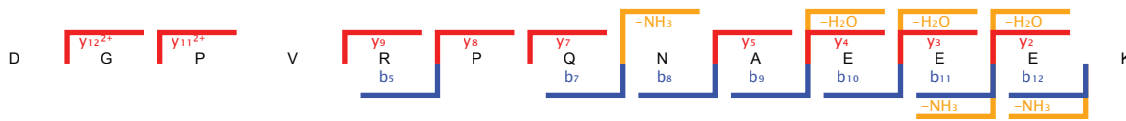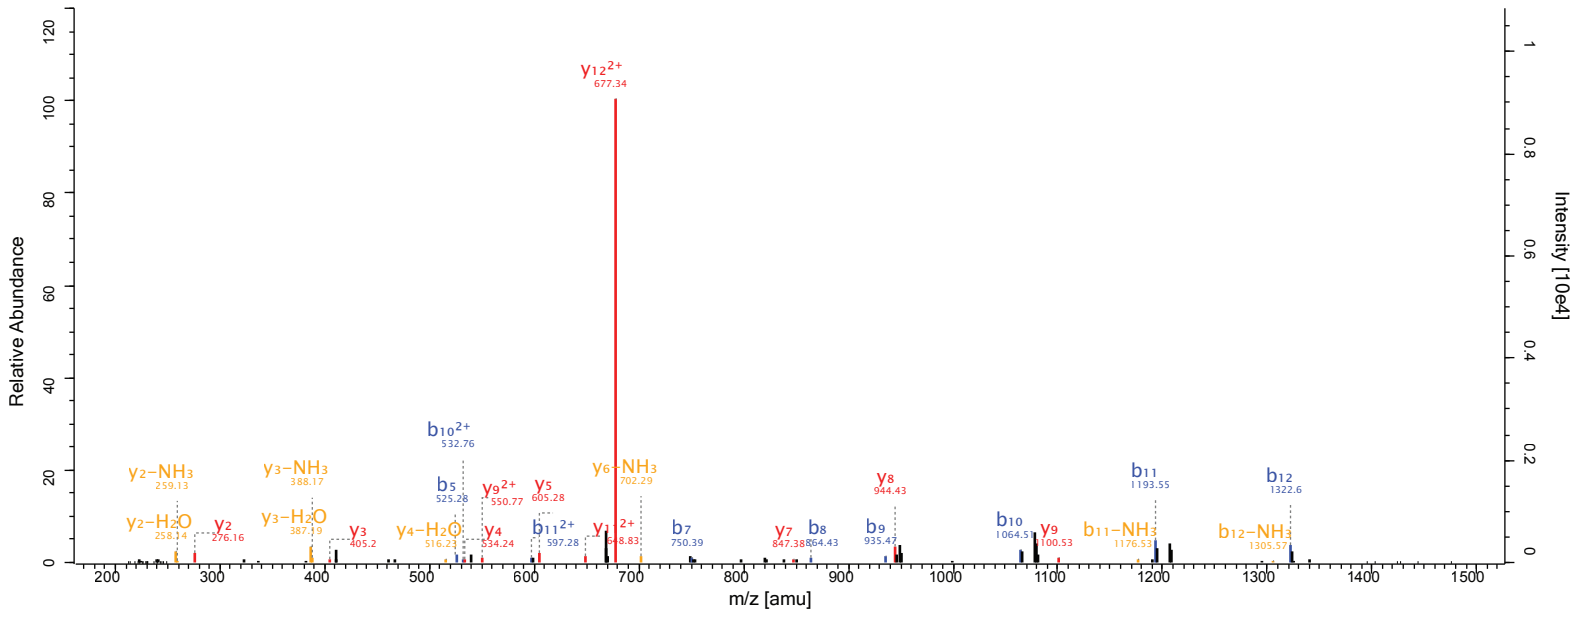

Scan number 7401 Raw file SP\_120724\_194  
 Method ITMS; CID Genenames SLC44A4

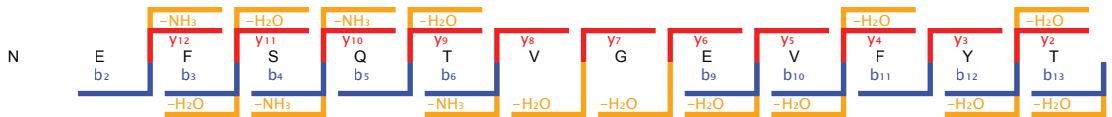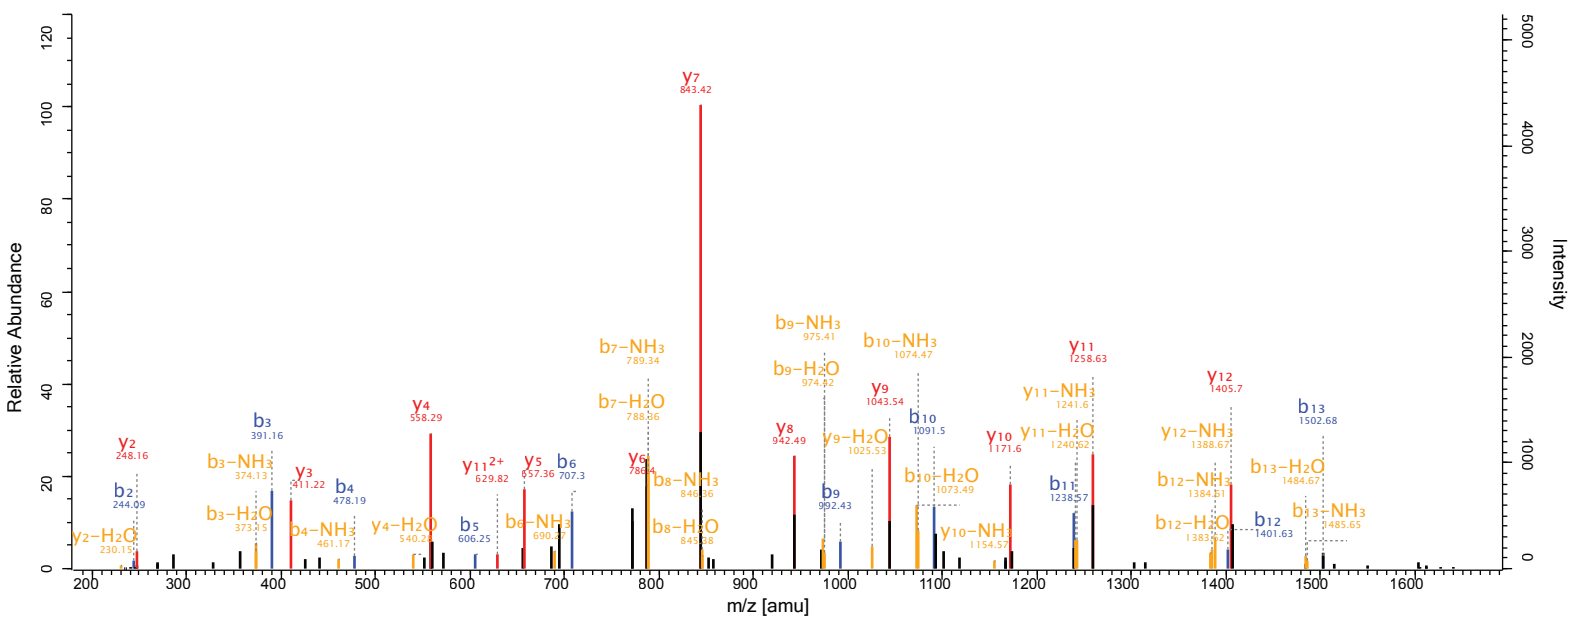

Scan number 5684 Raw file SP\_120724\_101  
 Method ITMS; CID Genenames SSR3

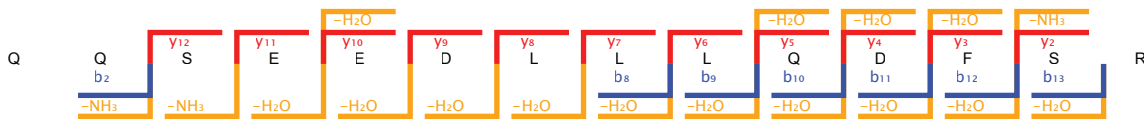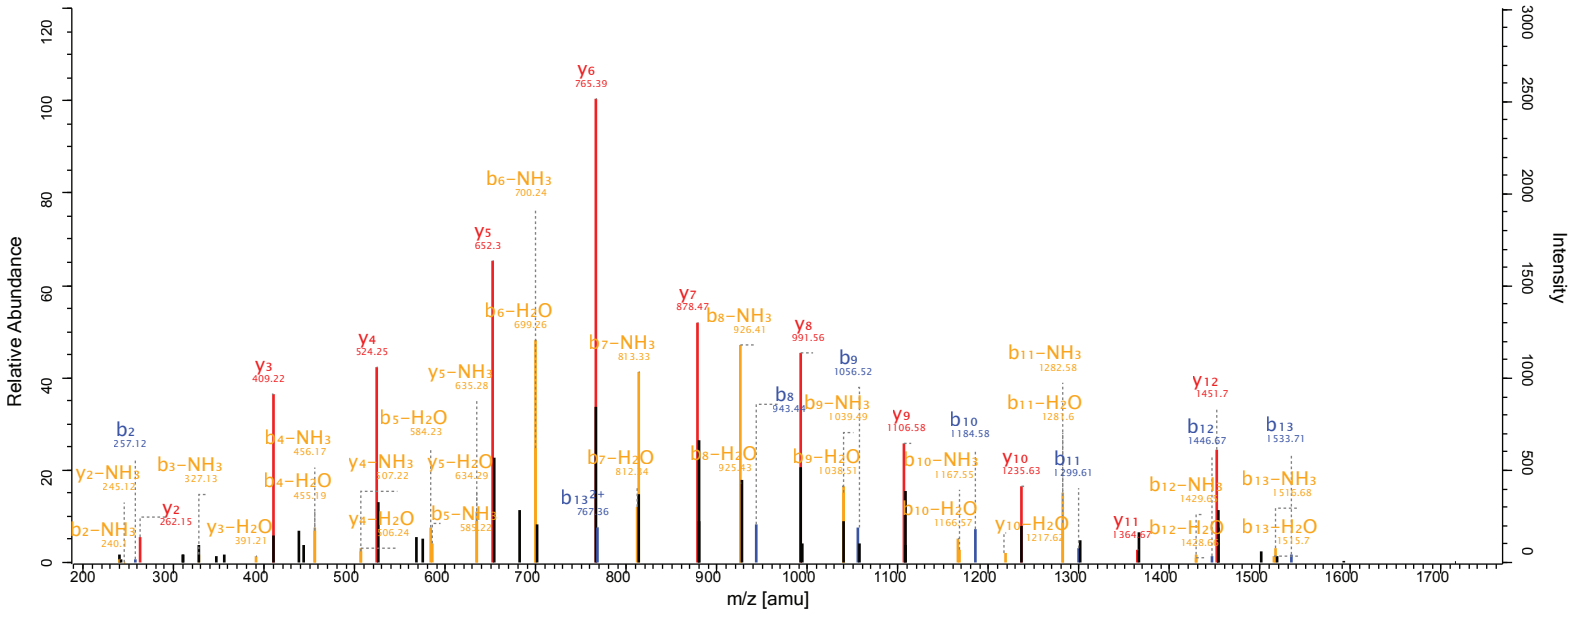

Scan number 4951 Raw file SP\_120724\_114  
 Method ITMS; CID Genenames TMEM38B

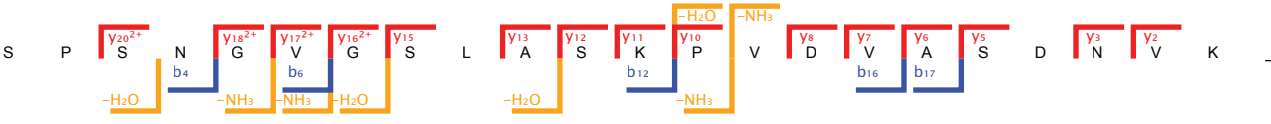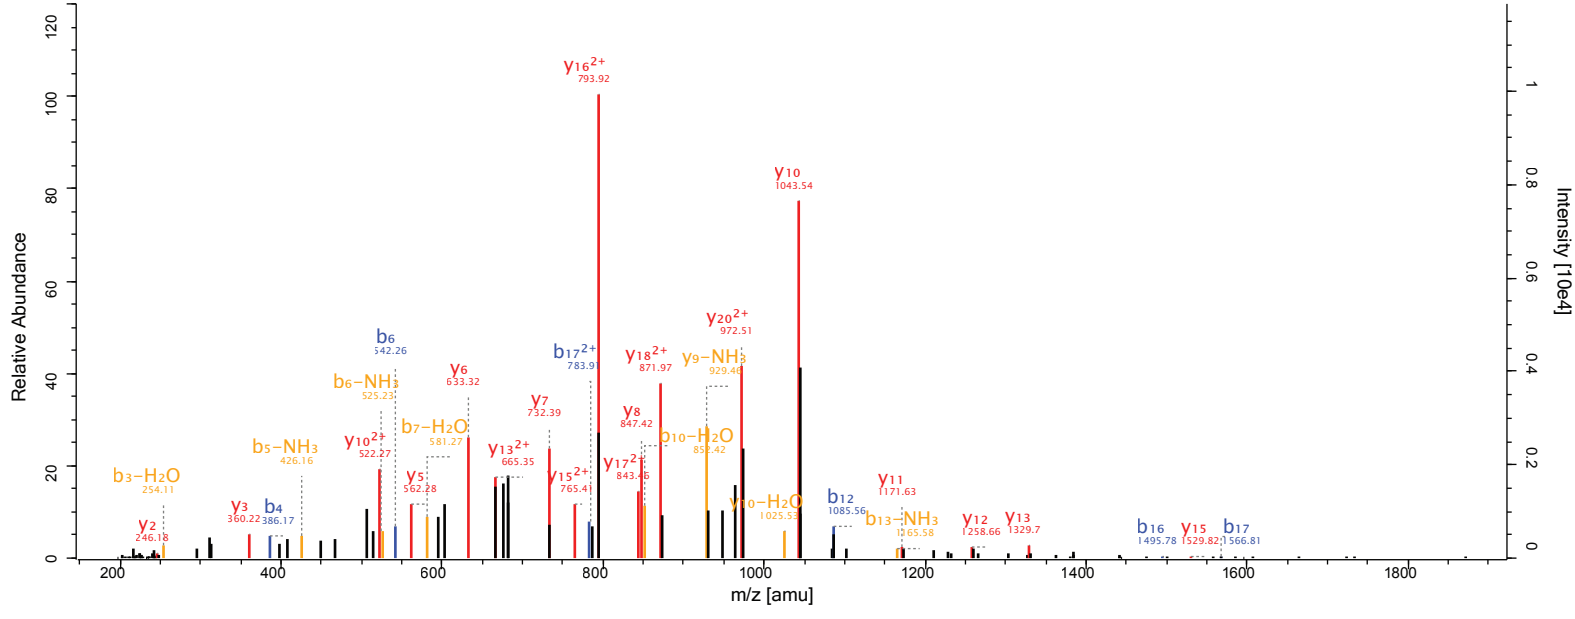

Scan number 979 Raw file SP\_120724\_144  
 Method ITMS; CID Genenames TMEM125

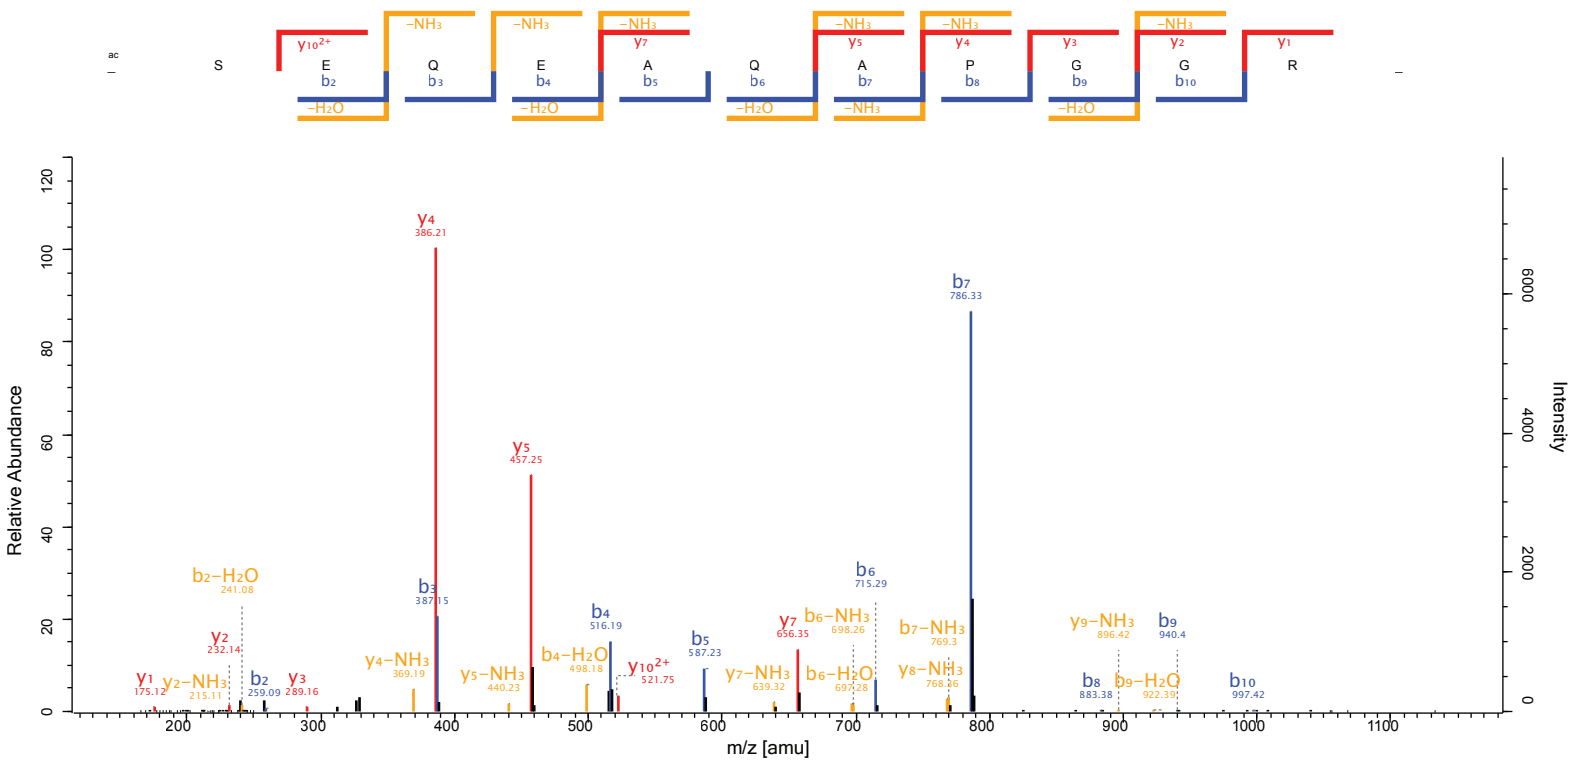

Scan number 3582 Raw file SP\_120724\_213  
 Method ITMS; CID Genenames TMEM223

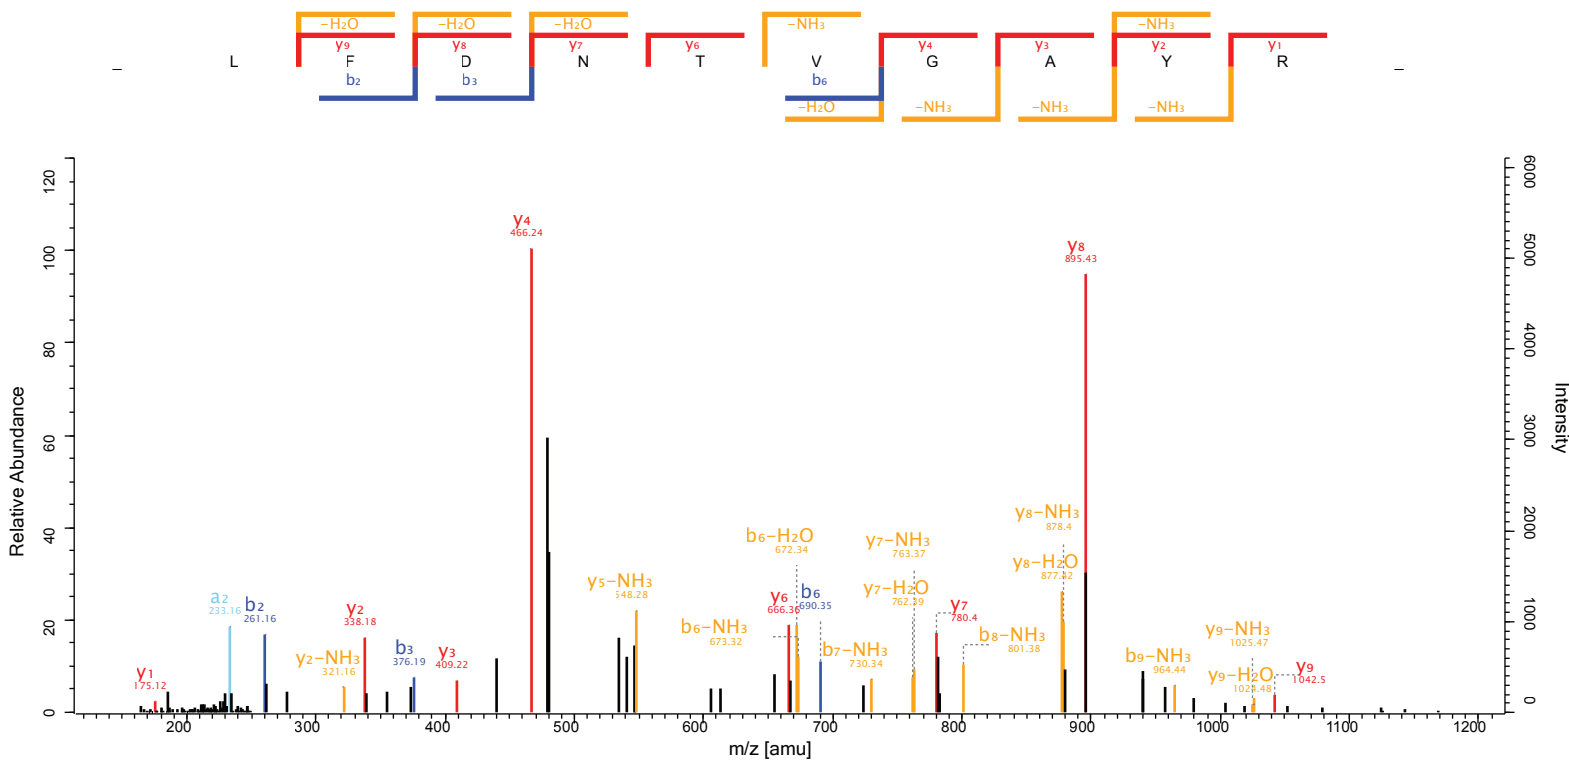

Scan number 1343 Raw file SP\_120724\_210  
 Method ITMS; CID Genenames TMEM245

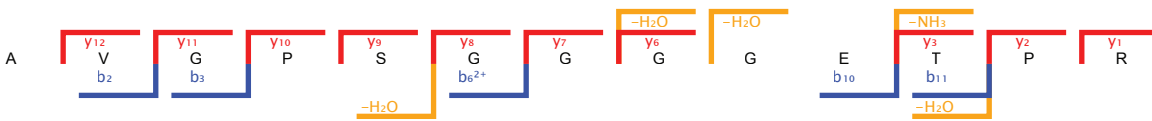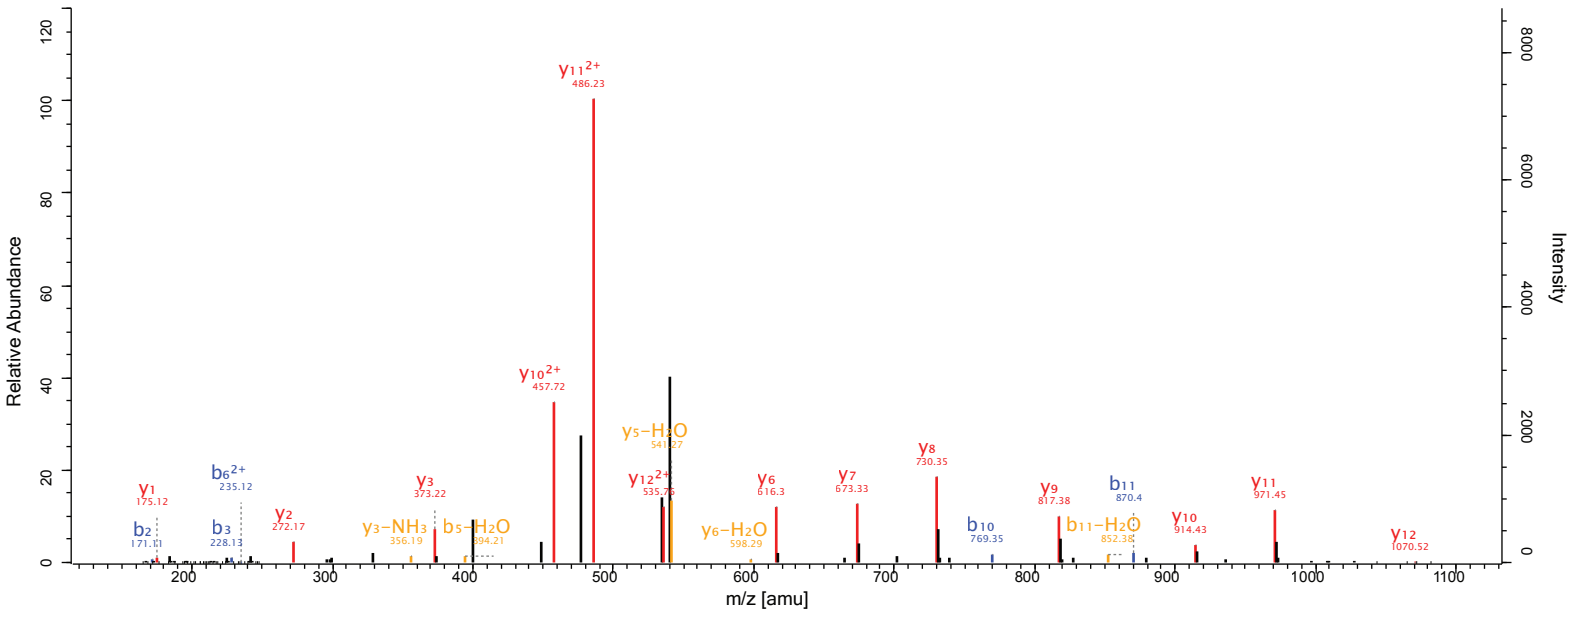

Scan number 7805 Raw file SP\_120724\_194  
 Method ITMS; CID Genenames TSPAN1

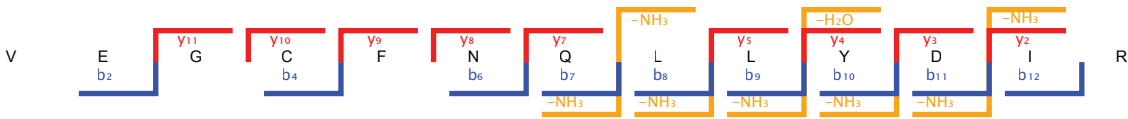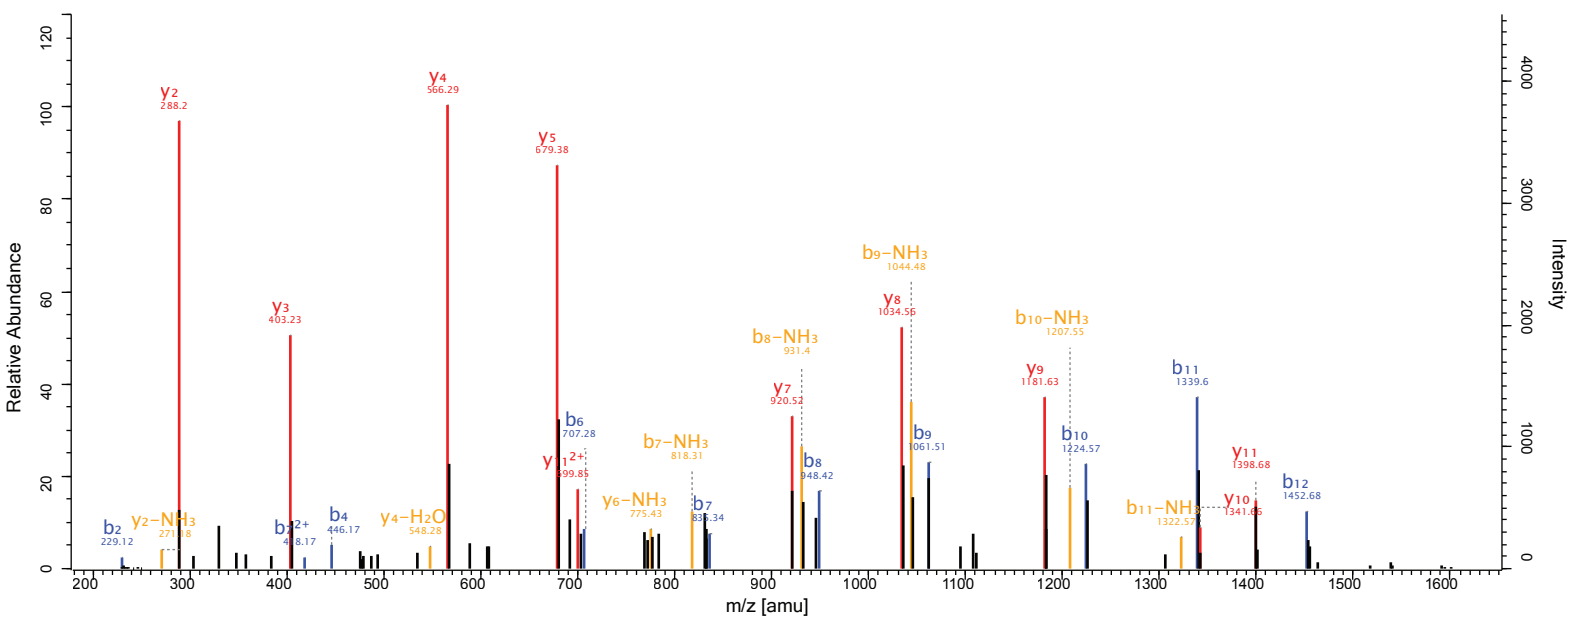

Scan number 3061 Raw file SP\_120724\_101  
 Method ITMS; CID Genenames TUBB4B

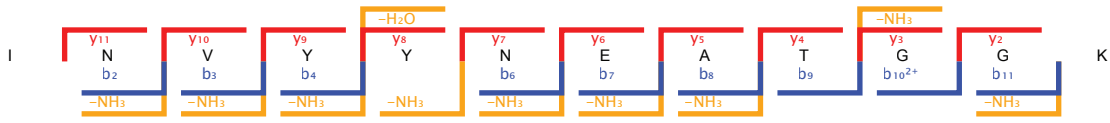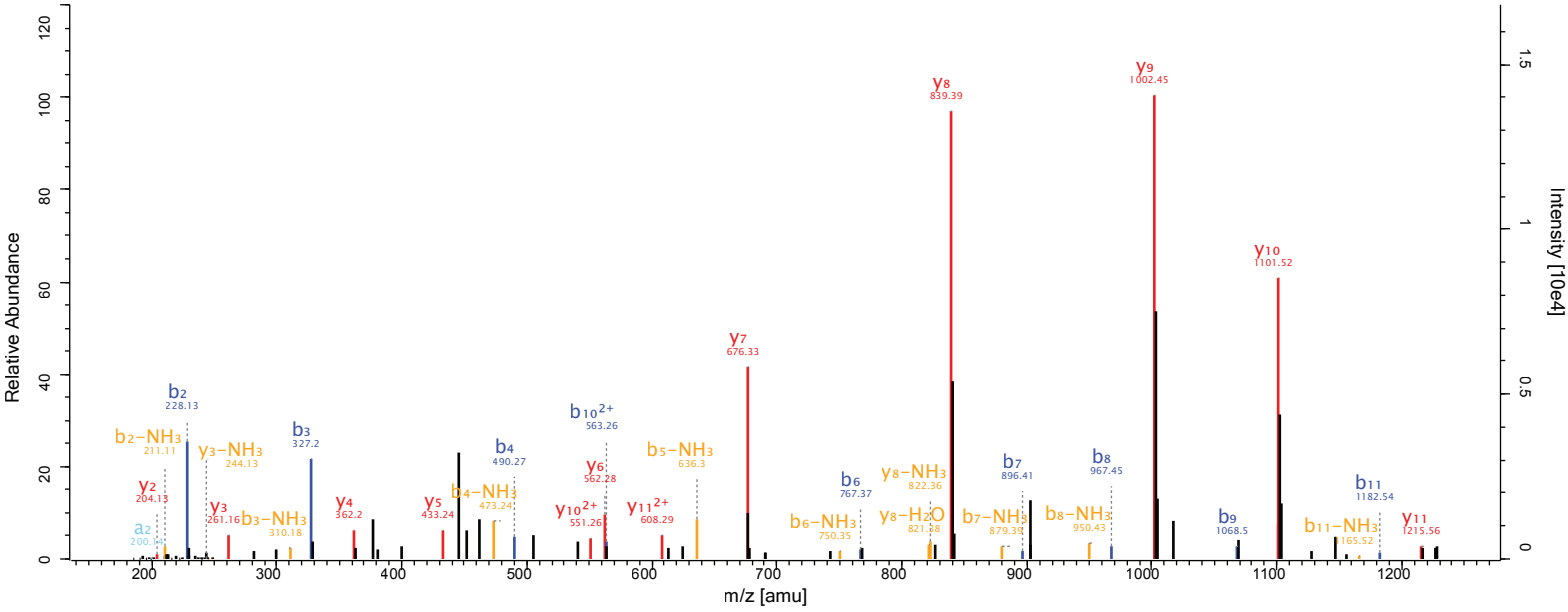

Scan number 5289 Raw file SP\_120724\_121  
 Method ITMS; CID Genenames UNC45A

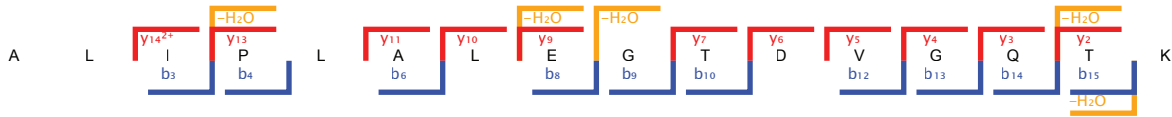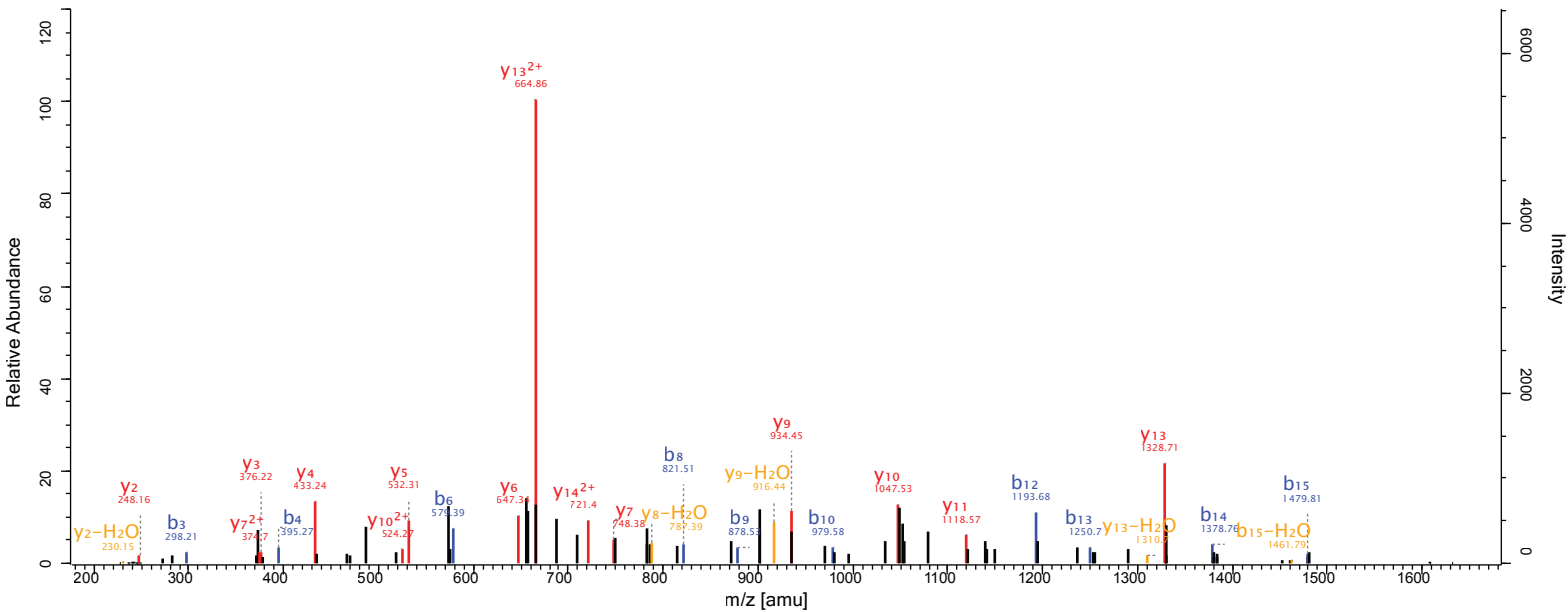



Scan number 7806 Raw file SP\_120724\_185  
 Method ITMS; CID Genenames VPS45

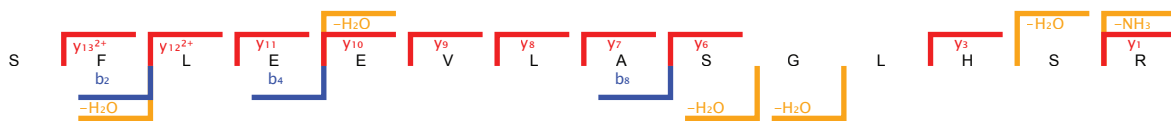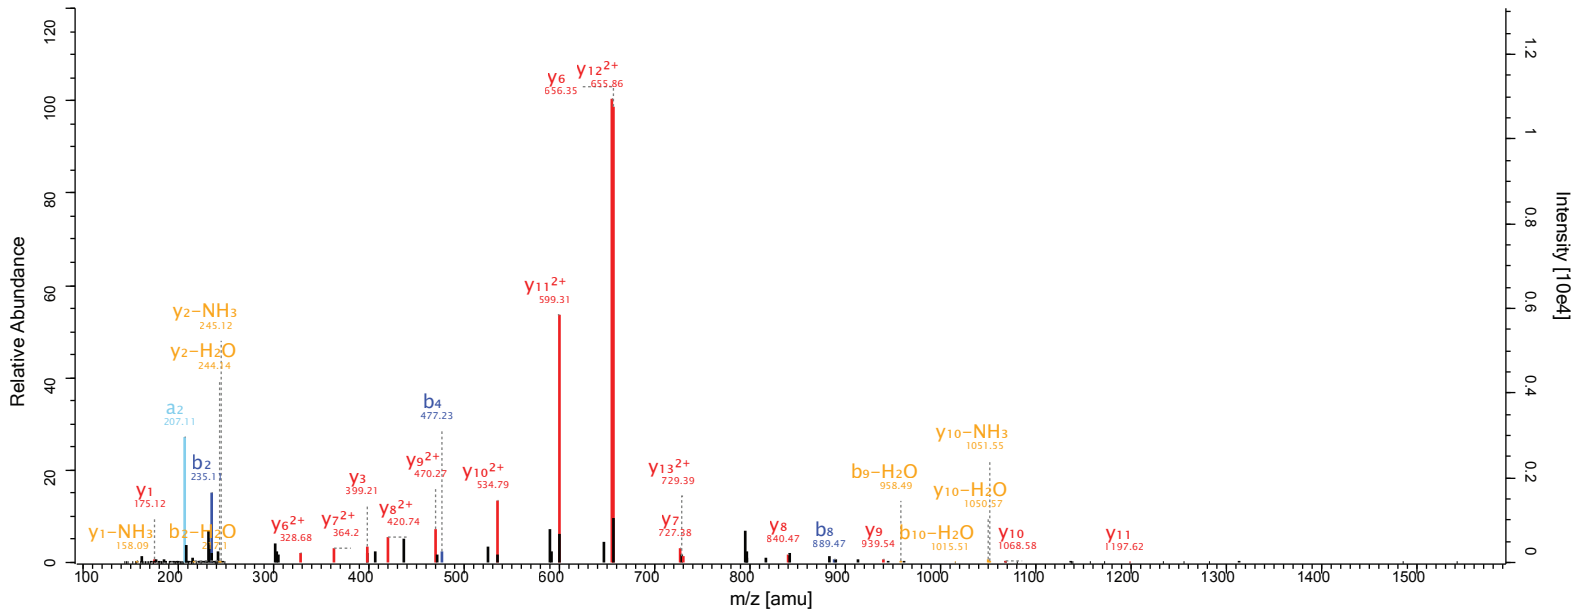

Scan number 959 Raw file SP\_120724\_154  
 Method ITMS; CID Genenames WDR830S

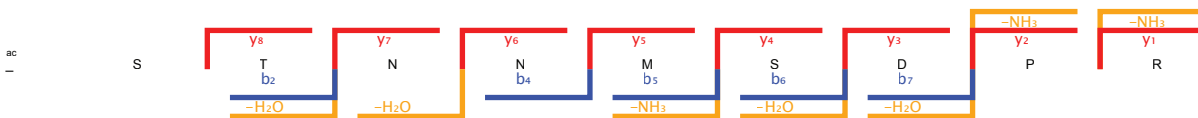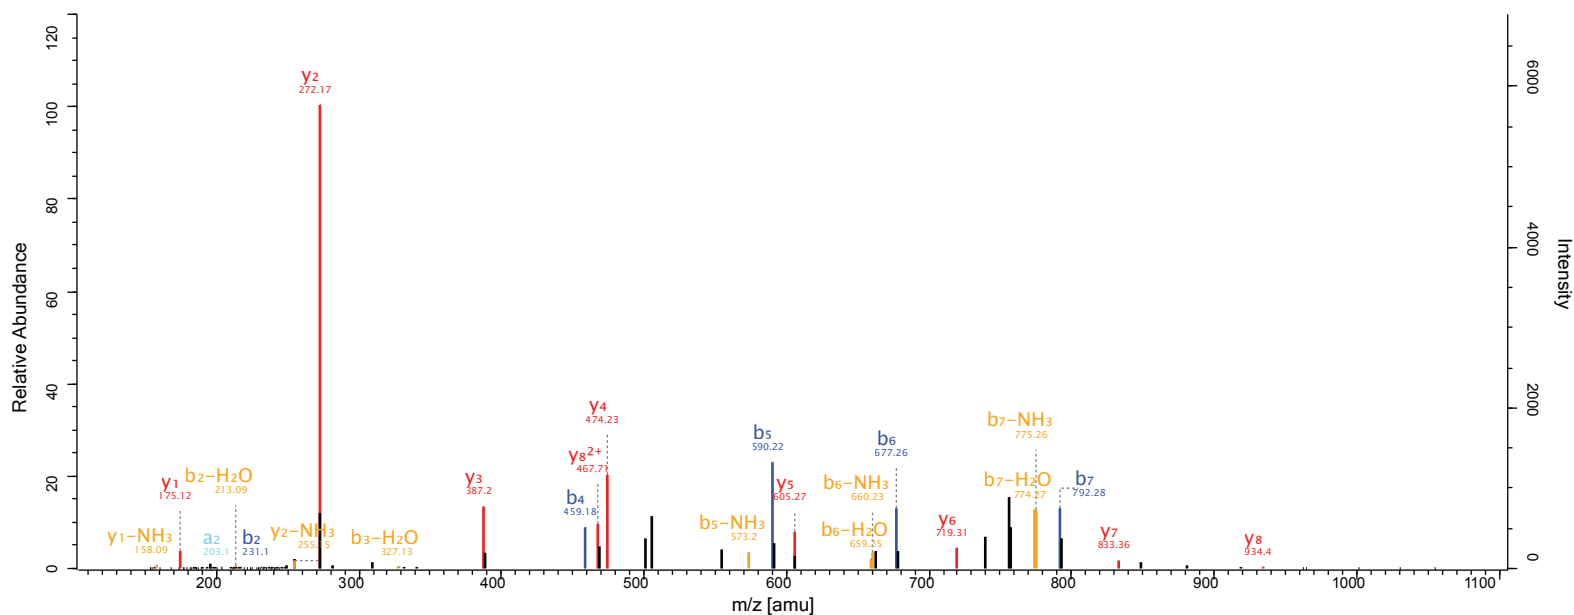

Supplement: supp_M114.040204_mcp.M114.040204-2.pdf [file supp_M114.040204_mcp.M114.040204-2.pdf]
